***An atlas of trait associations with resting-state and task-evoked human brain functional architectures in the UK Biobank***

**Running title: fMRI atlas of trait associations**

Bingxin Zhao<sup>1,7</sup>, Tengfei Li<sup>2,3,7</sup>, Yujue Li<sup>1</sup>, Zirui Fan<sup>1</sup>, Di Xiong<sup>4</sup>, Xifeng Wang<sup>4</sup>, Mufeng Gao<sup>4</sup>  
and Hongtu Zhu<sup>3,4,5,6 \*</sup>

<sup>1</sup>Department of Statistics, Purdue University, West Lafayette, IN 47907, USA.

<sup>2</sup>Department of Radiology, University of North Carolina at Chapel Hill, Chapel Hill, NC 27599, USA.

<sup>3</sup>Biomedical Research Imaging Center, School of Medicine, University of North Carolina at Chapel Hill, Chapel Hill, NC 27599, USA.

<sup>4</sup>Department of Biostatistics, University of North Carolina at Chapel Hill, Chapel Hill, NC 27599, USA.

<sup>5</sup>Department of Genetics, University of North Carolina at Chapel Hill, Chapel Hill, NC 27599, USA.

<sup>6</sup>Department of Computer Science, University of North Carolina at Chapel Hill, Chapel Hill, NC 27599, USA.

<sup>7</sup>These authors contributed equally to this work.

*\*Corresponding author:*

Hongtu Zhu

3105C McGavran-Greenberg Hall, 135 Dauer Drive, Chapel Hill, NC 27599.

E-mail address: [htzhu@email.unc.edu](mailto:htzhu@email.unc.edu) Phone: (919) 966-7250

medRxiv has withdrawn this manuscript because it was submitted and made public without the full consent of all the authors. Therefore, this work should not be cited as reference for the project. If you have any questions, please contact the corresponding author.
