1 ***An atlas of trait associations with resting-state and task-evoked human brain***  
2 ***functional architectures in the UK Biobank***

3

4 **Running title: fMRI atlas of trait associations**

5

6 Bingxin Zhao<sup>1,9</sup>, Tengfei Li<sup>2,3,9</sup>, Yujue Li<sup>1</sup>, Zirui Fan<sup>1</sup>, Di Xiong<sup>4</sup>, Xifeng Wang<sup>4</sup>, Mufeng Gao<sup>4</sup>,  
7 Stephen M. Smith<sup>5</sup>, and Hongtu Zhu<sup>3,4,6,7,8\*</sup>

8

9 <sup>1</sup>Department of Statistics, Purdue University, West Lafayette, IN 47907, USA.

10 <sup>2</sup>Department of Radiology, University of North Carolina at Chapel Hill, Chapel Hill, NC  
11 27599, USA.

12 <sup>3</sup>Biomedical Research Imaging Center, School of Medicine, University of North Carolina at  
13 Chapel Hill, Chapel Hill, NC 27599, USA.

14 <sup>4</sup>Department of Biostatistics, University of North Carolina at Chapel Hill, Chapel Hill, NC  
15 27599, USA.

16 <sup>5</sup>Wellcome Centre for Integrative Neuroimaging, FMRIB, Nuffield Department of Clinical  
17 Neurosciences, University of Oxford, Oxford, UK.

18 <sup>6</sup>Department of Genetics, University of North Carolina at Chapel Hill, Chapel Hill, NC  
19 27599, USA.

20 <sup>7</sup>Department of Computer Science, University of North Carolina at Chapel Hill, Chapel Hill,  
21 NC 27599, USA.

22 <sup>8</sup>Department of Statistics and Operations Research, University of North Carolina at Chapel  
23 Hill, Chapel Hill, NC 27599, USA.

24 <sup>9</sup>These authors contributed equally to this work.

25

26 *\*Corresponding author:*

27 Hongtu Zhu

28 3105C McGavran-Greenberg Hall, 135 Dauer Drive, Chapel Hill, NC 27599.

29 E-mail address: [htzhu@email.unc.edu](mailto:htzhu@email.unc.edu) Phone: (919) 966-7250

30

31

32

1 **Abstract**

2 Functional magnetic resonance imaging (fMRI) has been widely used to identify brain  
3 regions linked to critical functions, such as language and vision, and to detect tumors,  
4 strokes, brain injuries, and diseases. It is now known that large sample sizes are necessary  
5 for fMRI studies to detect small effect sizes and produce reproducible results. Here we  
6 report a systematic association analysis of 647 traits with imaging features extracted from  
7 resting-state and task-evoked fMRI data of more than 40,000 UK Biobank participants.  
8 We used a parcellation-based approach to generate 64,620 functional connectivity  
9 measures to reveal fine-grained details about cerebral cortex functional architectures.  
10 The difference between functional organizations at rest and during task has been  
11 quantified, and we have prioritized important brain regions and networks associated with  
12 a variety of human traits and clinical outcomes. For example, depression was most  
13 strongly associated with decreased connectivity in the somatomotor network. We have  
14 made our results publicly available and developed a browser framework to facilitate  
15 exploration of brain function-trait association results (<http://165.227.92.206/>).

16  
17 **Keywords:** Brain function; Functional connectivity; Human traits; Mental Health; Resting  
18 fMRI; Task fMRI; UK Biobank.

19  
20  
21  
22  
23  
24  
25  
26  
27  
28  
29  
30

1 Functional magnetic resonance imaging (fMRI) is a noninvasive and comprehensive  
2 method of assessing functional architectures of the human brain. By measuring blood  
3 oxygen level dependent (BOLD) signal changes, fMRI can map complex brain functions  
4 and estimate neural correlations between different brain regions<sup>1</sup>. When the subject is  
5 performing a specific task, fMRI can detect brain signals and regions that link to the task<sup>2</sup>,  
6 which is known as task-evoked fMRI. As an alternative, resting-state fMRI can observe  
7 brain signals during rest and measure intrinsic functional organization without performing  
8 any tasks<sup>3</sup>. Both task-evoked and resting-state fMRIs have been widely used in clinical and  
9 epidemiological neuroscience research to explore the relationship between inter-  
10 individual variations in brain function and human traits. For example, resting-state  
11 functional abnormalities are frequently observed in neurological and psychiatric  
12 disorders, such as Alzheimer's disease<sup>4</sup>, attention-deficit/hyperactivity disorder (ADHD)<sup>5</sup>,  
13 schizophrenia<sup>6</sup>, and major depressive disorder (MDD)<sup>7</sup>. fMRI has also been used to  
14 identify the influence of multi-system diseases and complex traits, such as diabetes<sup>8</sup>,  
15 alcohol consumption<sup>9</sup>, and dietary behaviors<sup>10</sup>, on brain functions.

16  
17 A major limitation of most fMRI association studies has been their small sample size,  
18 which is usually less than one hundred or a few hundred. Comparatively to structural  
19 magnetic resonance imaging (sMRI) measures, functional connectivity measures are  
20 generally noisier and show larger intra-subject variations<sup>11</sup>. Consequently, it may be  
21 difficult to replicate fMRI-trait associations found in small studies<sup>12</sup>. This problem can be  
22 resolved statistically by increasing the sample size of fMRI studies, which can detect  
23 weaker signals and reduce the uncertainty of the results. For example, Marek, et al. <sup>12</sup>  
24 showed that when the sample size is larger than 2,000, brain-behavioral phenotype  
25 associations can become more reproducible. However, the high assessment costs of fMRI  
26 may make it difficult to increase sample sizes sufficiently to collect the necessary data in  
27 every study. In the last few years, several large-scale fMRI datasets involving over 10,000  
28 subjects have become publicly available, including the Adolescent Brain Cognitive  
29 Development<sup>13</sup> (ABCD), the Chinese Imaging Genetics (CHIMGEN)<sup>14</sup>, and the UK Biobank<sup>15</sup>  
30 (UKB). Particularly, the UKB study collected a rich variety of human traits and disease  
31 variables<sup>16</sup>, providing the opportunity to discover and validate fMRI-trait associations in  
32 a large-scale cohort.

1  
2 Based on fMRI data from more than 40,000 subjects in the UKB study, we investigated  
3 resting-state and task-evoked functional architectures and their associations with human  
4 traits and health outcomes. By processing raw fMRI images from the UKB study, we  
5 represented the brain as a functional network containing 360 brain areas in a  
6 parcellation<sup>17</sup> developed using the Human Connectome Project<sup>18</sup> (HCP) data (referred to  
7 as the Glasser360 atlas, **Fig. 1**, **Fig. S1**, and **Table S1**). The Glasser360 atlas contained  
8 64,620 full correlation measures to represent the functional connections among brain  
9 areas, providing fine-grained details of functional architecture over 12 functional  
10 networks<sup>19</sup>: the primary visual, secondary visual, auditory, somatomotor, cingulo-  
11 opercular, default mode, dorsal attention, frontoparietal, language, posterior  
12 multimodal, ventral multimodal, and orbito-affective networks. We performed a  
13 systematic analysis with 647 traits and diseases (selected to represent a wide range of  
14 traits and health conditions) using a discovery-validation design. Functional brain regions  
15 and networks were found to be strongly associated with a range of disorders and complex  
16 traits, including depression, risk-taking, cognitive traits, the use of electronic devices,  
17 physical activity, and atrial fibrillation. We also explored the differences between resting-  
18 state and task-evoked functional architectures, as well as age and sex-related effects. In  
19 order to evaluate how the choice of parcellation may impact our results, we additionally  
20 applied another parcellation<sup>20</sup> on the same datasets, which divided the brain into 200  
21 regions, referred to as the Schaefer200 atlas (**Fig. S2** and **Table S2**). We found that the  
22 two parcellations can yield similar conclusions and patterns, whereas the Glasser360 atlas  
23 can provide more biological insights due to its finer partitioning. The results of our trait-  
24 fMRI association studies have been made publicly available, and a browser tool has been  
25 developed to facilitate exploring the data (<http://165.227.92.206/>).

26

## 27 **RESULTS**

### 28 **Consistency and reproducibility of the cerebral cortex functional organizations**

29 First, we examined the consistency and reproducibility of functional connectivity using  
30 annotations from the Glasser360 atlas in the UKB study. As in Glasser, et al.<sup>17</sup>, we first  
31 compared the group means of two independent sets of UKB subjects: the UKB phases 1  
32 and 2 data (imaging data released up through 2018<sup>21</sup>,  $n = 17,374$  for resting and 15,891



1 for task) and the UKB phase 3 data (data released in early 2020,  $n = 16,852$  for resting and  
2 13,232 for task, removing the relatives of subjects in early released data). **Figures S3-S4**  
3 illustrate the consistent spatial patterns of functional connectivity across the two  
4 independent groups. Similar to previous studies of other datasets<sup>13,17,22</sup>, the group mean  
5 maps in the two independent datasets of the UKB study were highly similar, with the  
6 correlation across the 64,620 ( $360 \times 359/2$ ) functional connectivity being 0.996 in resting  
7 fMRI and 0.994 in task fMRI. These results may suggest that the HCP-trained Glasser360  
8 atlas can provide a set of well-defined and biologically meaningful brain functional traits  
9 that are generalizable across datasets.

10  
11 Next, we evaluated the intra-subject reproducibility of the Glasser360 atlas using the  
12 repeat scans from the UKB repeat imaging visit ( $n = 2,771$  for resting and 2,014 for task,  
13 average time between visits = 2 years). We performed two analyses. The first analysis is  
14 to compare the group mean maps of the original imaging visit to those of the repeat visit.  
15 Group means were highly consistent between the two visits, with correlation of 0.997 and  
16 0.994 for resting and task fMRIs, respectively (ranges across different networks were  
17 [0.995, 0.999] for resting and [0.987, 0.998] for task, **Figs. S5-S6**). The second analysis  
18 quantified individual-level differences between the two visits. Specifically, we evaluated  
19 the reproducibility of each functional connectivity by calculating the correlation between  
20 two observations from all revisited individuals. Overall, the average reproducibility was  
21 0.37 (standard error = 0.11) for resting fMRI and 0.31 (standard error = 0.08) for task fMRI  
22 (**Figs. 2A-B**). The reproducibility of within-network connectivity was generally high in  
23 resting fMRI (**Fig. 2C**, mean = 0.46). During task fMRI, the overall reproducibility was  
24 decreased (mean = 0.32) and the secondary visual and posterior multimodal networks  
25 exhibited higher functional connectivity on average than others. In addition, the  
26 connectivity within activated functional areas (defined by group-level Z-statistic maps,  
27 **Supplementary Note**) showed higher reproducibility than that within nonactivated areas  
28 (**Fig. 2D** and **Fig. S7A**, mean = 0.40 vs. 0.30,  $P < 2.2 \times 10^{-16}$ ). The majority of the above-  
29 defined activations occurred in the secondary visual, dorsal attention, and somatomotor  
30 networks (**Fig. S8**). Furthermore, we examined the reproducibility of amplitude measures  
31 of fMRI<sup>23,24</sup>, which quantified the functional activity within each of the 360 brain areas.  
32 The average amplitude reproducibility was 0.60 (standard error = 0.08) for resting fMRI

1 and 0.45 (standard error = 0.07) for task fMRI (**Fig. 2E**). In accordance with the findings in  
2 functional connectivity, the reproducibility of amplitude measurements of activated areas  
3 in task fMRI was higher than that of nonactivated areas (**Fig. 2F**, mean = 0.49 vs. 0.43,  $P =$   
4  $1.1 \times 10^{-12}$ ).

5  
6 Finally, we compared the spatial patterns of UKB and HCP studies. The correlation  
7 between UKB and HCP was 0.90 for resting fMRI and 0.78 for task fMRI in the group mean  
8 analysis (**Fig. S9**). These results demonstrate a substantial level of overall consistency  
9 between the typical subjects in a healthy young adult cohort and those of middle age and  
10 older age. Next, we examined the reproducibility of functional connectivity in the  
11 Glasser360 atlas using the repeated scans in HCP study ( $n = 1075$ , average time between  
12 two scans = 1 day). The average reproducibility was 0.40 (standard error = 0.09) for resting  
13 fMRI and 0.22 (standard error = 0.11) for task fMRI (the emotion task) (**Fig. S7B**). These  
14 results show that the two studies have similar reproducibility, suggesting that the quality  
15 of fMRI traits in the biobank-scale UKB study is comparable to that of the HCP project.  
16 Similar to the UKB study, the connectivity among activated functional areas (defined by  
17 group-level Z-statistic maps, **Supplementary Note**) had higher reproducibility than the  
18 nonactivated connectivity in HCP task fMRI (**Fig. S7C**, mean = 0.382 vs. 0.225,  $P < 2.2 \times 10^{-$   
19  $16$ ). In general, the excellent group mean map consistency, as well as the similar  
20 reproducibility between the UKB and the HCP studies, provides confidence that the  
21 Glasser360 atlas will be able to consistently annotate the functional organization of  
22 typical subjects in a healthy population. On the other hand, the relatively low intra-subject  
23 reproducibility of fMRI matches previous findings<sup>11</sup>, may suggest that a large sample size  
24 is needed to produce reproducible association results in downstream analyses<sup>12</sup>.

## 25 26 **Comparison of resting-state and task-evoked functional architectures**

27 Understanding how the brain changes its functionality in response to tasks/stimuli is of  
28 great interest and has a wide range of clinical applications<sup>25</sup>. For example, fMRI studies  
29 with an emotional task consistently showed abnormalities in the prefrontal cortex-limbic  
30 area in patients with anxiety disorders, who tend to overreact to emotional stimuli<sup>26</sup>.  
31 Based on relatively small sample sizes, previous literature has found that intrinsic and  
32 extrinsic functional architectures are highly similar, with small but consistent differences

1 across a range of tasks<sup>27-33</sup>. Using parcellation-based data from the large-scale UKB study,  
2 we uncover more details about resting-task functional connectivity differences.

3

4 The correlation between resting fMRI and task fMRI group mean maps was 0.754 in the  
5 UKB study and 0.782 in the HCP study, indicating the high degree of similarity between  
6 intrinsic and extrinsic functional architectures (**Fig. S9**). We found that the auditory and  
7 default mode networks exhibited the greatest resting-task differences. In the auditory  
8 network, task fMRI revealed stronger intra-hemispheric connections than resting fMRI,  
9 while the inter-hemispheric connections in task fMRI generally weakened or remained  
10 unchanged (**Fig. S10**). Task-related changes were more complex in the default mode  
11 network. To summarize the patterns, we grouped the 77 areas in the default mode  
12 network into seven clusters, mainly based on their physical locations (**Fig. S11**). We found  
13 that functional connectivity within the frontal, visual, and hippocampal clusters was  
14 stronger in task fMRI than in resting fMRI, while the connectivity between the frontal and  
15 the other two clusters decreased (**Fig. S12**). Moreover, the frontal cluster of default mode  
16 network can be further divided into two subclusters, the first subcluster consisted of  
17 left/right 9a, 9m, 9p, 8BL, 8Ad, and 8Av areas, mainly in the dorsolateral superior frontal  
18 gyrus (referred to as the dorsolateral superior subcluster); and the second one included  
19 left/right 10v, 10r, p32, a24, and 10d areas in the medial orbital superior frontal gyrus and  
20 pregenual anterior cingulate cortex (referred to as the medial orbital superior subcluster).  
21 The dorsolateral superior subcluster had decreased connectivity with the areas in other  
22 clusters of the default mode network in task fMRI, especially those in the temporal  
23 cluster. On the other hand, the medial orbital superior subcluster had a greater level of  
24 connectivity with a few other areas of the default mode network when performing the  
25 task, especially with the orbitofrontal complex (OFC) cluster and the neighboring 10pp  
26 area. Furthermore, the visual cluster maintained strong intra-cluster connectivity during  
27 the task, whereas its connectivity with the angular, frontal, and temporal clusters  
28 decreased. Although the default mode network has been originally recognized as brain  
29 areas with greater connectivity in resting fMRI than task fMRI<sup>34</sup>, recent studies have found  
30 that the default mode network also had positive functional contributions to tasks, which  
31 may result in increased activity in task fMRI<sup>35</sup>. Our results provided further insight into

1 the complicated task-positive and task-negative functional connectivity change patterns  
2 in this network.

3  
4 Several areas of the secondary visual network were less connected to other visual areas  
5 when the task was performed, including the left/right V6A (in the superior occipital), V6  
6 (in the cuneus), VMV1 (in the lingual gyrus), and VMV2 (in the lingual and fusiform gyrus)  
7 (Fig. S13). Interestingly, some of these visual areas, such as the left/right V6, had  
8 increased functional connectivity with the default mode network (Fig. S14). There was  
9 also an increase in connections between the default mode network and other major  
10 cognitive networks, such as the cingulo-opercular and frontoparietal (Fig. S15). For the  
11 somatomotor network, the insula-related areas (including left/right Ig, FOP2, OP2-3, and  
12 right RI) had reduced connections with other somatomotor areas in task fMRI (Fig. S16).  
13 Similar to the auditory network, the inter-hemispheric connectivity in the cingulo-  
14 opercular network decreased in task fMRI (Fig. S17). Additionally, we found that the  
15 dorsal attention, frontoparietal, and language networks had similar functional  
16 connectivity patterns in resting and task fMRI (Figs. S18-S20). In summary, our results  
17 confirm the similarity of functional structures between resting and task fMRI, while also  
18 identifying specific patterns of differences.

### 19 20 **Age effects and sex differences in functional architectures**

21 By using the large-scale fMRI data, we quantified the age and sex effect patterns on  
22 resting and task functional organizations (Methods). Several studies have examined the  
23 effects of age and differences between males and females on brain structures and  
24 functions, but the locations and patterns of the reported differences may vary across  
25 studies<sup>36,37</sup>. We used unrelated white British subjects in UKB phases 1-3 data release (until  
26 early 2020) as our discovery sample ( $n = 33,795$  for resting and 28,907 for task) and  
27 validated the results in an independent hold-out dataset, which included non-British  
28 subjects in UKB phases 1-3 data release and all subjects in UKB phase 4 data release (early  
29 2021 release, removed the relatives of our discovery sample,  $n = 5,961$  for resting and 4,  
30 884 for task). The full list of the adjusted covariates can be found in the Methods section.  
31 We reported the results passing the Bonferroni significance level ( $7.73 \times 10^{-7} =$

1 0.05/64,620) in the discovery dataset and being significant at the nominal significance  
2 level (0.05) in the validation dataset.

3

4 There were widespread age effects on functional connectivity of resting and task fMRI,  
5 and network and area-specific details were revealed (**Figs. 3A-B**). For example, as age  
6 increased, the connections within the auditory, secondary visual, somatomotor,  
7 language, and cingulo-opercular networks were generally weaker (**Figs. S21A-E**). Some  
8 areas had particularly large age-effects, such as the left/right Pol2 (the posterior insular  
9 area 2) areas in the cingulo-opercular network. However, both positive and negative age  
10 effects were observed in the frontoparietal and default mode networks (**Figs. S21F** and  
11 **S22**). Some areas had a greater degree of aging effects, such as the left/right POS2 (the  
12 parieto-occipital sulcus area 2) areas in the frontoparietal network and left/right POS1  
13 (the parieto-occipital sulcus area 1) areas in the default mode network. Negative age  
14 effects in the default mode network were strongest in the hippocampal cluster, such as  
15 the left/right PHA1 (the parahippocampal area 1) areas.

16

17 In task fMRI, age effects were different from those in resting fMRI. We highlighted a few  
18 patterns. First, the age effects in the auditory network were mainly on the inter-  
19 hemispheric connections, where the connectivity between the left and right hemispheres  
20 decreased with aging (**Fig. S23A**). Similarly, the inter-hemispheric connectivity between  
21 the auditory and cingulo-opercular networks declined as we aged. The age effects on  
22 intra-hemispheric connections were much weaker. Except for a few areas (such as the  
23 right 8Ad and right PEF), most areas in the cingulo-opercular and default mode networks  
24 had reduced functional connectivity with aging (**Fig. S23B** and **S24**). On the other hand,  
25 most of the functional connectivity in the secondary visual network increased with aging,  
26 especially the left/right V3A and V6A areas in the superior occipital gyrus (**Fig. S23C**).  
27 There were both positive and negative effects of aging on other networks, such as the  
28 somatomotor, frontoparietal, and dorsal attention (**Figs. S23D-F**). Overall, these results  
29 describe the detailed age effect pattern for functional organizations at rest and during  
30 task performance.

31

32

1 We also examined the age effects on amplitude measures. In resting fMRI, age-related  
2 decreases in brain activity were observed in most brain areas, with the strongest effects  
3 in left and right PreS areas (the presubiculum, a subarea of the parahippocampal region,  
4  $\beta < -0.222$ ,  $P < 5.01 \times 10^{-193}$ , **Fig. 3C**). In task fMRI, however, both strong positive and  
5 negative effects on brain activity were widely observed (**Fig. 3D**). Because widespread age  
6 effects were detected on both functional connectivity and amplitude traits, we examined  
7 the conditional age effects on functional connectivity traits after additionally including  
8 amplitude traits as covariates. After adjusting for amplitude traits, most of the age effects  
9 on functional connectivity traits became much smaller and were not significant at the  
10 Bonferroni significance level, especially in the resting fMRI (**Fig. S25**). For example,  
11 although a few of the strongest amplitude-adjusted age effects remained significant,  
12 most of the other moderate amplitude-adjusted age effects failed to pass the Bonferroni  
13 significance level in the default mode network (**Fig. S26**). Overall, these results for  
14 amplitude traits indicate that age has a significant effect on the variation of amplitude  
15 traits across subjects, which may also be carried over to functional connectivity traits<sup>23</sup>.

16

17 Functional connectivity patterns differed between males and females. We found  
18 widespread sex differences across different resting fMRI networks, with the strongest  
19 differences occurring in the somatomotor network (**Fig. 3E**). Males had stronger  
20 functional connectivity in the somatomotor and auditory networks as well as a few  
21 specific areas, including the left/right VIP (in the superior parietal gyrus), LIPv (in the  
22 superior parietal gyrus), PH (in the inferior temporal gyrus), and V6A (in the superior  
23 occipital gyrus) of the secondary visual network, the left/right PFcm (in the superior  
24 temporal gyrus) and 43 (in the rolandic operculum) of the cingulo-opercular network, the  
25 left/right a9-46v and p9-46v (both in the middle frontal gyrus) of the frontoparietal  
26 network, and the left/right PGp (in the middle occipital gyrus) of the dorsal attention  
27 network (**Figs. S27A-F**). In the default mode network, the sex difference had a  
28 complicated pattern. Specifically, males had stronger connectivity in the hippocampal and  
29 OFC clusters, especially in the left 47m area of the posterior orbital gyrus. On the other  
30 hand, females had stronger connectivity in many other areas of the default mode network  
31 (**Fig. S28**).

32

1 The sex differences in task fMRI were more specific to particular brain areas, including the  
2 right V6A (in the superior occipital gyrus) and left VMV2 (in the lingual and fusiform gyrus)  
3 of the secondary visual network, left/right PHA3 (in the fusiform gyrus) of the dorsal  
4 attention network, and left/right RSC (in the middle cingulate cortex) of the frontoparietal  
5 network (**Fig. 3F** and **S29A-C**). Males had stronger functional connectivity than females in  
6 most areas of the language, auditory, and somatomotor networks (**Figs. S29D-F**).  
7 Additionally, males had stronger connectivity in the hippocampal and frontal areas of the  
8 default mode network, whereas females had stronger connectivity between the visual  
9 cluster and the frontal cluster (**Fig. S30**). As for the amplitude measures, females had  
10 stronger brain activity in many areas of the default mode network, whereas males had  
11 stronger brain activity in most other networks in resting fMRI (**Fig. 3G**). Sex differences  
12 were generally reduced in task fMRI amplitude measurements (**Fig. 3H**). Lastly, we  
13 estimated the amplitude-adjusted sex effects on functional connectivity traits by  
14 additionally controlling for the amplitude traits as covariates. Similar to the findings of the  
15 age effects, the majority of amplitude-adjusted sex effects on functional connectivity  
16 traits can be explained by amplitude traits, such as in the somatomotor and default mode  
17 networks (**Fig. S31-S32**). In summary, as the fMRI traits of the brain is strongly associated  
18 with cognitive impairment and functional abnormalities, our area- and network-specific  
19 sex effect maps can be useful for understanding sex differences in brain disorders, such  
20 as Alzheimer's Disease<sup>38</sup> and depression<sup>39</sup>.

21

## 22 **An atlas of trait associations with cerebral cortex functional areas**

23 In this section, a total of 647 phenotypes (selected to cover a wide range of traits and  
24 diseases) were examined for their associations with resting and task-functional  
25 organizations (Methods). Similar to the age and sex analyses, we used unrelated white  
26 British subjects in UKB phases 1-3 data release as the discovery sample ( $n = 33,795$  for  
27 resting and 28,907 for task) and validated the results in an independent hold-out dataset  
28 ( $n = 5,961$  for resting and 4,884 for task). Detailed information on the adjusted covariates  
29 can be found in the Methods section. We prioritized significant associations that survived  
30 at the false discovery rate (FDR) level of 5% (by the Benjamini-Hochberg procedure) in the  
31 discovery sample and remained significant at the nominal significance level (0.05) in the  
32 validation sample. Among the 647 traits, 120 had at least one significant association with

1 resting fMRI functional connectivity measures, among which 82 further survived the  
2 Bonferroni significance level ( $7.73 \times 10^{-7}$ ,  $0.05/64,620$ ) (**Table S3**). We highlighted below  
3 the association patterns with mental health, cognitive function, physical activity, lifestyle,  
4 biomarkers, and disease status.

5  
6 We observed strong associations between resting fMRI and multiple mental health traits,  
7 including risk-taking, depression, MDD, and neuroticism. Enrichments in specific  
8 networks and brain areas were observed. For example, risk-taking (Data field 2040) was  
9 strongly positively associated with the somatomotor network and the connections  
10 between the somatomotor and visual networks (**Fig. 4A**). Risk-taking was also negatively  
11 associated with the functional connections of the default mode network. Functional  
12 connectivity of sensory/motor areas was recently found to be positively associated with  
13 risk-taking<sup>40</sup> and our findings were consistent with the “sensory-motor-cognitive” mode  
14 of brain functional amplitude changes related to aging<sup>41</sup>. In addition, depression was  
15 mostly associated with reduced connectivity in the somatomotor and cingulo-opercular  
16 networks (curated disease phenotype based on ICD-10 codes, **Fig. 4B**). Consistent  
17 patterns were also observed in MDD (ICD-10 code F329, **Fig. S33A**), nervous feelings (Data  
18 field 1970, **Fig. S33B**), seen doctor for nerves anxiety tension or depression (Data field  
19 2090, **Fig. S33C**), neuroticism score (Data field 20127, **Fig. S33D**), and suffer from nerves  
20 (Data field 2010, **Fig. S33E**). Depression and depressive mood disorders have been linked  
21 to the abnormal brain connectivity in various intrinsic networks<sup>42-44</sup>, our results  
22 highlighted the specific patterns of the decreased resting functional connectivity,  
23 particularly in the somatomotor network.

24  
25 A wide range of cognitive traits were associated with functional connectivity in fMRI, such  
26 as the fluid intelligence (Data field 20016), the number of puzzles correctly solved (Data  
27 field 6373), duration to complete alphanumeric path (Data field 6350), and maximum  
28 digits remembered correctly (Data field 4282). These cognitive traits showed different  
29 association patterns. Fluid intelligence, for example, was associated with functional  
30 connectivity in the auditory, language, cingulo-opercular, dorsal attention, and default  
31 mode networks, most of the associations were positive (**Fig. 5A**). The duration to  
32 complete alphanumeric path was mainly negatively associated with functional



1 connectivity in the secondary visual network (**Fig. S34A**), the number of puzzles correctly  
2 solved was mostly related to the functional connectivity within the default mode,  
3 somatomotor, and secondary visual networks (**Fig. S34B**), and the maximum digits  
4 remembered correctly was positively related to the auditory and language networks (**Fig.**  
5 **S34C**). We also uncovered the association pattern for other brain-related complex traits,  
6 such as the strong connections between handedness (Data field 1707) and the cingulo-  
7 opercular network (**Fig. S34D**).

8

9 Resting functional connectivity was widely associated with lifestyle and environmental  
10 traits, including physical activity, electronic device use, smoking, diet, alcohol, and sun  
11 exposure. Similar to risk-taking, mobile phone usage-related traits (Data fields 1120,  
12 1140, and 1110) were consistently positively associated with the somatomotor network  
13 and connections between the somatomotor and visual networks (**Figs. S35A-C**). Watching  
14 television (TV) for longer periods of time (Data field 1070) may weaken functional  
15 connectivity in the somatomotor and visual networks as well as strengthen functional  
16 connectivity in the default mode network (**Fig. 5B**). TV viewing has been found to be  
17 associated with brain structural variations in visual cortex and sensorimotor areas<sup>45</sup>.  
18 Moreover, longer time spent outdoors in summer (Data field 1050) was associated with  
19 increased functional connectivity in the default mode network (**Fig. S35D**). These results  
20 may indicate that the default mode network is related to outdoor exploration and sunlight  
21 exposure.

22

23 We found associations between resting fMRI and multiple biomarkers, such as the basal  
24 metabolic rate (Data field 23105), albumin (Data field 30600), total protein (Data field  
25 30860), and vitamin D (Data field 30890). For example, the basal metabolic rate was  
26 associated with increased functional connectivity in the somatomotor network and  
27 reduced functional connectivity in the default mode network (**Fig. S36A**). Higher levels of  
28 albumin and total protein were mainly associated with reduced functional connectivity in  
29 the somatomotor and visual networks (**Figs. S36B-C**). Human albumin is the most  
30 abundant protein, and low serum albumin may increase the risk of Alzheimer's disease<sup>46</sup>.  
31 In addition, vitamin D was associated with increased functional connectivity, especially in  
32 the cingulo-opercular and somatomotor networks (**Fig. S36D**). Vitamin D is important for

1 maintaining brain health, and vitamin D deficiency has been associated with the  
2 development of dementia, depression, and other mental illnesses<sup>47</sup>.

3

4 Strong associations between increased functional connectivity and cardiovascular  
5 diseases were identified, including the atrial fibrillation (curated disease phenotype and  
6 ICD-10 code I48), vascular/heart problems diagnosed by doctor (Data field 6150), and  
7 hypertension (curated disease phenotype and ICD-10 code I10). Atrial fibrillation is the  
8 most common clinically significant arrhythmia, and increasing evidence suggests it is  
9 associated with cognitive decline and dementia<sup>48</sup>. We found that atrial fibrillation was  
10 widely associated with functional connectivity across different networks (**Figs. S37A-B**).  
11 Hypertension and vascular/heart problems were associated with reduced functional  
12 connectivity in the auditory, somatomotor, secondary visual, and cingulo-opercular  
13 networks (**Figs. S37C-D**). Hypertension is a major risk factor of vascular dementia and  
14 Alzheimer's Disease and altered functional connections may reflect the early effects of  
15 vascular risk factors on brain functions<sup>49</sup>.

16

17 In task fMRI, 96 traits had at least one significant association at the FDR 5% level (and  
18 significant at the nominal level in the validation dataset), and 59 further survived the  
19 Bonferroni significance level ( $7.73 \times 10^{-7} = 0.05/64,620$ ) (**Table S3**). Of the 96 traits, 69  
20 were also significantly associated with resting fMRI at the 5% FDR level. The association  
21 patterns in task and resting fMRI were very similar for a few traits, such as the atrial  
22 fibrillation (**Fig. S38**). For many traits, however, we observed different patterns in resting  
23 and task fMRI, including fluid intelligence (**Figs. S39A-B**), the number of puzzles correctly  
24 solved (**Figs. S39C-D**), time spent outdoors in summer (**Figs. S40A-B**), time spent watching  
25 TV (**Figs. S40C-D**), and basal metabolic rate (**Figs. S41A-B**). For example, both fluid  
26 intelligence and the number of solved puzzles were positively associated with intra-  
27 hemispheric connections of the auditory network in task fMRI, whereas no or negative  
28 associations were observed with inter-hemispheric connections. There were similar intra-  
29 and inter-hemispheric connection differences in the cingulo-opercular network. Overall,  
30 the results indicate differences between resting and task-related functional associations  
31 with complex traits, especially for cognitive functions.

32

1 Task fMRI also revealed new insights into the brain function associations with more traits,  
2 such as early life factors. Specifically, we found strong associations between task fMRI  
3 and the place of birth in UK (the north co-ordinate and east co-ordinate, Data fields 129  
4 and 130) in the auditory, somatomotor, and cingulo-opercular networks (**Fig. S42A-B**).  
5 These results may shed light on the impact of the environment on brain development  
6 related to the emotion processing task. Additionally, we observed stronger associations  
7 with multiple biomarkers than in resting fMRI, such as the triglycerides (Data field 30870,  
8 **Fig. S42C**) and urate (Data field 30880, **Fig. S42D**). In contrast, task fMRI was not  
9 associated with a few traits that were strongly related to resting fMRI, including mental  
10 health traits (such as risk-taking and depression) and electronic device use (such as usage  
11 of mobile phone).

12

13 We also quantified the association patterns with amplitude traits and prioritized brain  
14 areas whose functional activity was related to traits and diseases. We observed similar  
15 patterns to the functional connectivity results. For example, risk-taking has the strongest  
16 associations with brain activity of the postcentral gyrus in the somatomotor network,  
17 especially the primary somatosensory cortex<sup>40</sup> (**Fig. 4C**,  $\beta > 0.033$ ,  $P < 8.14 \times 10^{-6}$ ). The  
18 postcentral gyrus, insula, and Rolandic operculum areas of the somatomotor network  
19 were most negatively related to depression (**Fig. 4D**,  $\beta < -0.036$ ,  $P < 7.10 \times 10^{-7}$ ). All  
20 significant associations with fluid intelligence were positive, with the top three areas  
21 being the middle cingulate, anterior cingulate, and orbital part of the inferior frontal gyrus  
22 (IFG pars orbitalis) in the default mode network (**Fig. 5C**,  $\beta > 0.053$ ,  $P < 1.31 \times 10^{-12}$ ). Time  
23 spent watching TV was strongly negatively associated with the postcentral gyrus,  
24 precentral gyrus, paracentral lobule, and the supplementary motor area in the  
25 somatomotor network (**Fig. 5D**,  $\beta < -0.050$ ,  $P < 2.03 \times 10^{-12}$ ). In summary, this section  
26 analyzes fMRI data with a variety of complex traits in a discovery-validation design. We  
27 provide new insights into the association maps with human brain resting and task  
28 functional organizations, which could assist in building better disease prediction models  
29 and selecting clinically useful neuroimaging biomarkers. The full set of results can be  
30 browsed at <http://165.227.92.206/traitList.html>.

31

32 **Alternative analyses using the Schaefer200 atlas**

1 The brain parcellation may play a crucial role in the definition of the brain functional  
2 network and affect the results of downstream analysis<sup>50</sup>. To explore the impact of  
3 parcellation choice on the large-scale UKB study, we additionally applied another  
4 parcellation (the Schaefer200 atlas<sup>20</sup>) and repeated our analysis of on the same set of  
5 subjects. Briefly, the Schaefer200 atlas partitioned the brain into 200 regions, resulting in  
6 19,900 pairwise functional full correlation measures ( $200 \times 199/2$ ). We mapped the 200  
7 regions onto the same 12 networks used in the Glasser360 atlas (**Table S2**, Methods).

8  
9 The average reproducibility in the Schaefer200 atlas was 0.387 (standard error = 0.10) for  
10 resting fMRI and 0.312 (standard error = 0.07) for task fMRI, which was in the same range  
11 as the Glasser360 atlas. **Figure S43** compares the reproducibility of the two parcellations.  
12 Glasser360 and Schaefer200 atlases showed similar patterns across a variety of networks,  
13 with the largest differences being observed in the secondary visual network, where the  
14 Glasser360 atlas was more reproducible. In addition, consistent spatial patterns of  
15 functional connectivity were observed in the two parcellations, although the strength of  
16 connectivity was slightly higher in the Schaefer200 atlas, which may partly be explained  
17 by the smaller number of brain areas (**Fig. S44**). These results demonstrate the good  
18 generalizability of functional organizations modeled by the Glasser360 atlas.

19  
20 We evaluated the age and sex effects in the Schaefer200 atlas. **Figure S45** compares the  
21 age effect patterns in the Schaefer200 and Glasser360 atlases. In both atlases, decreasing  
22 resting functional connectivity was consistently associated with aging, especially in the  
23 auditory, cingulo-opercular, and somatomotor networks. The main difference was in the  
24 secondary visual network, where the age effects in the Glasser360 atlas were stronger  
25 than those in the Schaefer200 atlas (**Fig. S45A**). This finding may be attributed to the  
26 lower reproducibility of the Schaefer200 atlas in the secondary visual network, suggesting  
27 that the Glasser360 atlas may be more suitable for studying the brain connectivity of the  
28 visual cortex. In addition, consistent intra- and inter-hemispheric association differences  
29 in task fMRI were observed (**Fig. S45B**). The Schaefer200 and Glasser360 atlases also  
30 showed similar sex effect patterns, in which the strongest effects were both detected in  
31 the somatomotor and auditory networks (**Fig. S46**).

32

1 Next, we repeated the association analysis with the 647 traits. In resting fMRI, 131 traits  
2 had at least one significant association at the FDR 5% level and 83 further passed the  
3 Bonferroni significance level ( $2.51 \times 10^{-6} = 0.05/19,900$ , also passing the nominal  
4 significance level (0.05) in the independent validation dataset, **Table S3**). Of the 120 traits  
5 with significant associations in the Glasser360 atlas analysis, 109 (90.83%) were also  
6 significant in the Schaefer200 atlas analysis. Additionally, the association maps were  
7 largely consistent in the two atlases. For example, time spent watching TV was  
8 consistently associated with decreased functional connections of the somatomotor and  
9 visual networks, as well as increased functional connectivity in the default mode network  
10 (**Fig. S47A**). Moreover, fluid intelligence was consistently linked to increased functional  
11 connectivity, particularly in the language and auditory networks (**Fig. S47B**). In both  
12 atlases, depression was associated with reduced functional connectivity in the  
13 somatomotor and cingulo-opercular networks (**Fig. S48**). At the FDR 5% level, 90 traits  
14 showed significant associations with task fMRI, including 76 of the 96 (79.2%) traits that  
15 were significant in the Glasser360 atlas analysis (**Table S3**). All these results are available  
16 on our website. In summary, the Schaefer200 atlas results agree well with those of the  
17 Glasser360 atlas, indicating that the patterns observed in our Glasser360 analysis are not  
18 parcellation-specific.

19

20 Finally, we examined the trait associations with 1,701 functional connectivity traits based  
21 on the whole brain spatial independent component analysis (ICA)<sup>24,51,52</sup> approach in  
22 resting fMRI. These ICA functional connectivity traits were available from the UK Biobank  
23 data release (<https://www.fmrib.ox.ac.uk/ukbiobank/index.html>, Data fields 25752 and  
24 25753), which were partial correlations and the timeseries were estimated from group  
25 ICA maps via the dual-regression<sup>24</sup>. Of the 647 traits, 76 demonstrated at least one  
26 significant association at the FDR 5% level and 58 remained significant at the Bonferroni  
27 significance level ( $2.94 \times 10^{-5} = 0.05/1,701$ , also passing the nominal significance level in  
28 the independent validation dataset, **Table S3**). Among the 76 ICA-significant traits, 65  
29 (85.53%) were also significant in the above Glasser360 atlas analysis. Compared to the  
30 ICA-derived traits, parcellation-based traits from the Glasser360 atlas (which identified  
31 significant associations with 120 complex traits at the FDR 5% level and 82 at the  
32 Bonferroni significance level) were able to detect associations with more traits.

1  
2  
3  
4  
5  
6  
7  
8  
9  
10  
11  
12  
13  
14  
15  
16  
17  
18  
19  
20  
21  
22  
23  
24  
25  
26  
27  
28  
29  
30  
31

In addition, we ranked the 58 ICA-significant complex traits (at the Bonferroni significance level) by the number of their significant associations with ICA-derived traits. Then we compared the association strengths of the top ten traits with ICA-derived traits and those with Glasser360 traits. On these ten traits, ICA-derived traits and Glasser360 traits showed similar levels of association strength (**Fig. S49**). For example, many ICA-derived and Glasser360 traits were found to be significantly associated with systolic blood pressure (Data field 4080), and most of these associations were in a similar range of effect size and *P* value (**Figs. S50-51**). Furthermore, the results of Glasser360 traits indicate that the auditory and somatomotor networks may be more strongly associated with systolic blood pressure than other networks. In summary, parcellation-based traits may reveal more network and area-level details with comparable association strength to ICA-derived traits.

**Fluid intelligence prediction by integrating multiple data types.**

Our association analyses demonstrate the potential value of large-scale fMRI data for a variety of complex traits and disorders in clinical and epidemiological research. For example, it is of great interest to construct prediction models by integrating fMRI data and other data types<sup>53-55</sup>. Fluid intelligence is a key indicator of cognitive ability and is associated with multiple neurological and neuropsychiatric disorders<sup>56</sup>. In this section, we performed prediction for fluid intelligence using neuroimaging traits from multiple modalities, including resting fMRI, task fMRI, diffusion MRI (dMRI)<sup>21</sup>, and structural MRI (sMRI)<sup>57</sup>. We further integrated these neuroimaging data with a wide range of other data types, including common genetic variants, biomarkers, local environments, early life factors, diet, and behavioral traits. The relative contributions and joint performance of these data types were assessed in a training, validation, and testing design (Methods). All model parameters were tuned using the validation data and we evaluated the prediction performance on the independent testing data by calculating the correlation between the predicted values and the observed intelligence, while adjusting for the covariates listed in the Methods section.

1 The prediction performance of multi-modality neuroimaging traits was summarized in  
2 **Figure 6A**. The prediction correlation of resting fMRI was 0.272 (standard error = 0.012),  
3 suggesting that about 7.4% variation in fluid intelligence can be predicted by resting fMRI  
4 connectivity. The prediction correlation was similar in task fMRI (correlation = 0.279) and  
5 was improved to 0.333 by jointly using resting and task fMRI, which suggests that resting  
6 and task fMRI had unique contributions to intelligence prediction. This improvement  
7 matched our association results where both resting and task fMRI showed strong  
8 associations with fluid intelligence with different spatial patterns. In addition, the dMRI  
9 and sMRI traits had much lower prediction accuracy than fMRI traits. Specifically, the  
10 prediction correlation was 0.09 for diffusion tensor imaging (DTI) parameters of dMRI and  
11 0.08 for regional brain volumes of sMRI. Moreover, adding these structural traits in  
12 addition to fMRI traits did not substantially improve the prediction performance  
13 (correlation = 0.342), indicating the prediction power of brain structural traits for  
14 intelligence can be largely captured by the functional traits.

15

16 Next, we examined the prediction performance of non-neuroimaging data types (**Fig. 6B**).  
17 The prediction correlation of intelligence genetic polygenic risk score (PRS) was 0.232  
18 (standard error = 0.013), which was slightly lower than the performance of resting fMRI.  
19 Several categories of lifestyle and environmental traits had strong predictive power,  
20 including physical activity (correlation = 0.205), sun exposure (correlation = 0.193), and  
21 diet (correlation = 0.153). Moreover, biomarkers, disease records, and early life factors  
22 all had significant predictive performance, with prediction correlations being 0.067,  
23 0.087, and 0.156, respectively. By combining all these non-neuroimaging data types, the  
24 prediction correlation increased to 0.381. The performance was further improved to  
25 0.440 by including neuroimaging data, which was much higher than when using only one  
26 type of data.

27

28 To explore whether the predictive power of non-neuroimaging traits (such as physical  
29 activity) is mediated by brain structure and function, we evaluated their conditional  
30 predictive performance on fluid intelligence after controlling for neuroimaging traits.  
31 There was a reduction of performance on multiple categories of non-neuroimaging  
32 predictors, suggesting their effects on intelligence may be indirect and partially mediated

1 by brain structure and function (**Fig. 6C** and **Table S4**). For example, the prediction  
2 performance of genetic PRS decreased from 0.232 to 0.186, indicating that 19.8% of the  
3 genetic predictive power on intelligence can be captured by brain structural and  
4 functional variations measured by brain MRI. The proportion was 28.3% for physical  
5 activity, 23.1% for diet, and 28.6% for early life factors. Overall, these results illustrate the  
6 neuroimaging traits, especially the ones from resting and task fMRI, are powerful  
7 predictors of cognitive function. Future studies can integrate genetic, biomarker,  
8 behavioral/environmental factors, and multi-modality MRI data for better prediction of  
9 brain-related complex traits and disorders.

## 11 **DISCUSSION**

12 Inter-individual variations in brain function and their relationship to human health and  
13 behavior are of great interest. The intra-individual reproducibility of brain fMRI traits is  
14 generally lower than that of structural MRI traits, although the group-level consistency is  
15 high<sup>11,13,22,58</sup>. Then it has been suggested that a large sample size is needed for fMRI  
16 studies to detect trait associations with small effect sizes<sup>59,60</sup>. The UKB study provided an  
17 extensive biobank-scale data resource for quantifying fMRI associations with many  
18 phenotypes. The present study conducted a systematic analysis of intrinsic and extrinsic  
19 functional architectures with a parcellation-based approach using fMRI data collected  
20 from over 40,000 individuals. We measured the differences between resting and task  
21 fMRI, investigated age and sex effects on brain function, and examined the cross-  
22 parcellation variability of our findings. We evaluated the fMRI associations with 647 traits  
23 chosen from a variety of trait domains. In comparison to the prior literature<sup>15</sup>, which  
24 applied data-driven spatial independent component analysis<sup>24,51,52</sup> to about 5000  
25 subjects, the parcellation-based approach and much larger sample size allowed us to  
26 quantify functional organizations in fine-grained details. We found distinct brain  
27 functional areas and networks that were strongly related to traits from various categories,  
28 such as mental health, physical activity, cognitive performance, and biomarkers. We  
29 developed integrative prediction models for fluid intelligence, suggesting that integrating  
30 fMRI traits with multiple data types can improve prediction performance for brain-related  
31 complex traits and diseases.



1 We found that the strongest sex difference in resting fMRI was in the somatomotor  
2 network, where females had weaker functional connectivity than males (**Fig. 3E**).  
3 Additionally, depression was strongly associated with decreased connectivity in the  
4 somatomotor network (**Fig. 4B**). Considering the fact that depression is two times more  
5 prevalent in females than in males, our results may help understand the brain function-  
6 related sex differences in depression<sup>39</sup>. In addition, we found that a wide variety of  
7 complex traits were strongly associated with the functional connectivity between the  
8 visual and somatomotor networks, including risk-taking, time spent watching TV, usage  
9 of mobile phone, albumin, and total protein (**Figs. 4A, 5B, S31A, S32B, and S32C**). Future  
10 studies could investigate the biological mechanisms underlying these functional  
11 connectivity alterations as well as causal medication pathways among lifestyle,  
12 biomarker, brain function, and mental health<sup>61</sup>.

13

14 Our results confirm that group-level intrinsic and extrinsic functional spatial patterns are  
15 largely similar (correlation = 0.754), as observed in previous fMRI datasets with smaller  
16 sample sizes<sup>27-32</sup>. The large-scale UKB data also revealed that resting and task fMRI may  
17 have different associations with complex traits, such as mental health and cognitive  
18 abilities. For example, depression was strongly associated with resting fMRI, but not with  
19 task fMRI. Moreover, in resting and task fMRI, the associations with fluid intelligence had  
20 different spatial distributions. Our prediction analysis further suggests that task fMRI has  
21 additional predictive power on intelligence on top of resting fMRI. These results  
22 demonstrate the differences between resting and task-evoked brain functions in terms of  
23 their connections with brain health and cognition.

24

25 The UKB task fMRI data used in this study were from a single emotion processing task<sup>62,63</sup>.  
26 Previous studies have shown that the functional architectures of different tasks were  
27 highly similar<sup>27,29,30</sup>. Hence, our findings from this specific task might be generalizable to  
28 other tasks. More insights might be revealed in future studies by integrating multiple  
29 neuroimaging data resources. For example, joint analysis with other large-scale  
30 neuroimaging studies, such as the ABCD study, may help understand the age-related  
31 interaction with complex traits across the lifespan. In addition, further investigations are  
32 needed to examine the effects of topographical misalignments on trait-fMRI associations

1 and sex differences. There has been an observation in the HCP study that the cross-  
2 subject variability can be explained by the misalignment in topography between  
3 individual subjects' true connectivity topography and group-average ICA maps used by  
4 the ICA dual regression<sup>64,65</sup>. This residual functional misalignment can mean that  
5 between-subject spatial variability appears as variability in network connectivity; the  
6 extent of this problem of misinterpretation may vary across different analysis methods  
7 (e.g., group-ICA with dual-regression vs hard parcellation). It would be interesting to  
8 quantify the effects of spatial misalignment on both parcellation-based and whole-brain  
9 ICA-based fMRI traits in the large-scale UKB dataset. Finally, our main analyses were  
10 based on parcellation-based full correlations. Although the FMRIB's ICA-based X-noiseifier  
11 (FIX) has been applied to the UKB dataset to remove scanner artifacts and motion effects,  
12 full correlation measures can be more sensitive to the remaining global artifacts and  
13 noises than partial correlations<sup>66,67</sup>. It is possible to further remove global artifacts by  
14 measuring the partial functional connectivity between paired brain regions after  
15 removing the dependency of other brain regions<sup>68</sup>. Future studies need to explore  
16 parcellation-based partial correlation traits for a large number of parcels (such as the 360  
17 regions in the Glasser360 atlas) with a limited number of time points in the UKB study.

18

## 19 **METHODS**

20 Methods are available in the **Methods** section.

21 *Note: One supplementary information pdf file, one supplementary figure pdf file, and one*  
22 *supplementary table zip file are available.*

23

## 24 **ACKNOWLEDGEMENTS**

25 This research was partially supported by U.S. NIH grants MH086633 (H.Z.) and MH116527  
26 (TF.L.). We thank the individuals represented in the UKB and HCP studies for their  
27 participation and the research teams for their work in collecting, processing and  
28 disseminating these datasets for analysis. We would like to thank the University of North  
29 Carolina at Chapel Hill and Purdue University and their Research Computing groups for  
30 providing computational resources and support that have contributed to these research  
31 results. This research has been conducted using the UK Biobank resource (application  
32 number 22783), subject to a data transfer agreement.

1  
2  
3  
4  
5  
6  
7  
8  
9  
10  
11  
12  
13  
14  
15  
16  
17  
18  
19  
20  
21  
22  
23  
24  
25  
26  
27  
28  
29  
30

**AUTHOR CONTRIBUTIONS**

B.Z., H.Z., and S.M.S designed the study. B.Z., T.L., Z.F., D.X., X.W., and M.G. processed and analyzed the data. Y.L. and B.Z. designed the website and developed online resources. B.Z. wrote the manuscript with feedback from all authors.

**CORRESPONDENCE AND REQUESTS FOR MATERIALS** should be addressed to H.Z.

**COMPETETING FINANCIAL INTERESTS**

The authors declare no competing financial interests.

**REFERENCES**

1 Power, J. D. *et al.* Functional network organization of the human brain. *Neuron* **72**, 665-678 (2011).

2 Ogawa, S., Lee, T.-M., Kay, A. R. & Tank, D. W. Brain magnetic resonance imaging with contrast dependent on blood oxygenation. *proceedings of the National Academy of Sciences* **87**, 9868-9872 (1990).

3 Biswal, B., Zerrin Yetkin, F., Haughton, V. M. & Hyde, J. S. Functional connectivity in the motor cortex of resting human brain using echo-planar MRI. *Magnetic resonance in medicine* **34**, 537-541 (1995).

4 Agosta, F. *et al.* Resting state fMRI in Alzheimer's disease: beyond the default mode network. *Neurobiology of aging* **33**, 1564-1578 (2012).

5 Posner, J., Park, C. & Wang, Z. Connecting the dots: a review of resting connectivity MRI studies in attention-deficit/hyperactivity disorder. *Neuropsychology review* **24**, 3-15 (2014).

6 Hu, M.-L. *et al.* A review of the functional and anatomical default mode network in schizophrenia. *Neuroscience bulletin* **33**, 73-84 (2017).

7 Mulders, P. C., van Eijndhoven, P. F., Schene, A. H., Beckmann, C. F. & Tendolkar, I. Resting-state functional connectivity in major depressive disorder: a review. *Neuroscience & Biobehavioral Reviews* **56**, 330-344 (2015).

1 8 Macpherson, H., Formica, M., Harris, E. & Daly, R. M. Brain functional alterations  
2 in Type 2 Diabetes—A systematic review of fMRI studies. *Frontiers in*  
3 *neuroendocrinology* **47**, 34-46 (2017).

4 9 Ewing, S. W. F., Sakhardande, A. & Blakemore, S.-J. The effect of alcohol  
5 consumption on the adolescent brain: A systematic review of MRI and fMRI  
6 studies of alcohol-using youth. *NeuroImage: Clinical* **5**, 420-437 (2014).

7 10 Zhao, J. *et al.* Intrinsic brain subsystem associated with dietary restraint,  
8 disinhibition and hunger: an fMRI study. *Brain imaging and behavior* **11**, 264  
9 (2017).

10 11 Elliott, M. L. *et al.* What is the test-retest reliability of common task-functional  
11 MRI measures? New empirical evidence and a meta-analysis. *Psychological*  
12 *Science* **31**, 792-806 (2020).

13 12 Marek, S. *et al.* Towards reproducible brain-wide association studies. *BioRxiv*  
14 (2020).

15 13 Chaarani, B. *et al.* Baseline brain function in the preadolescents of the ABCD  
16 Study. *Nature Neuroscience*, 1-11 (2021).

17 14 Xu, Q. *et al.* CHIMGEN: a Chinese imaging genetics cohort to enhance cross-  
18 ethnic and cross-geographic brain research. *Molecular psychiatry* **25**, 517-529  
19 (2020).

20 15 Miller, K. L. *et al.* Multimodal population brain imaging in the UK Biobank  
21 prospective epidemiological study. *Nature Neuroscience* **19**, 1523-1536 (2016).

22 16 Bycroft, C. *et al.* The UK Biobank resource with deep phenotyping and genomic  
23 data. *Nature* **562**, 203-209, doi:10.1038/s41586-018-0579-z (2018).

24 17 Glasser, M. F. *et al.* A multi-modal parcellation of human cerebral cortex. *Nature*  
25 **536**, 171-178 (2016).

26 18 Van Essen, D. C. *et al.* The WU-Minn human connectome project: an overview.  
27 *Neuroimage* **80**, 62-79 (2013).

28 19 Ji, J. L. *et al.* Mapping the human brain's cortical-subcortical functional network  
29 organization. *Neuroimage* **185**, 35-57 (2019).

30 20 Schaefer, A. *et al.* Local-global parcellation of the human cerebral cortex from  
31 intrinsic functional connectivity MRI. *Cerebral cortex* **28**, 3095-3114 (2018).

1 21 Zhao, B. *et al.* Common genetic variation influencing human white matter  
2 microstructure. *Science* **372** (2021).

3 22 Herting, M. M., Gautam, P., Chen, Z., Mezher, A. & Vetter, N. C. Test-retest  
4 reliability of longitudinal task-based fMRI: Implications for developmental  
5 studies. *Developmental cognitive neuroscience* **33**, 17-26 (2018).

6 23 Bijsterbosch, J. *et al.* Investigations into within-and between-subject resting-  
7 state amplitude variations. *Neuroimage* **159**, 57-69 (2017).

8 24 Alfaro-Almagro, F. *et al.* Image processing and Quality Control for the first 10,000  
9 brain imaging datasets from UK Biobank. *NeuroImage* **166**, 400-424 (2018).

10 25 Zheng, Y.-Q. *et al.* Accurate predictions of individual differences in task-evoked  
11 brain activity from resting-state fMRI using a sparse ensemble learner. *bioRxiv*  
12 (2021).

13 26 Li, J. *et al.* Emotion reactivity-related brain network analysis in generalized  
14 anxiety disorder: a task fMRI study. *BMC psychiatry* **20**, 1-13 (2020).

15 27 Cole, M. W., Bassett, D. S., Power, J. D., Braver, T. S. & Petersen, S. E. Intrinsic  
16 and task-evoked network architectures of the human brain. *Neuron* **83**, 238-251  
17 (2014).

18 28 Tavor, I. *et al.* Task-free MRI predicts individual differences in brain activity  
19 during task performance. *Science* **352**, 216-220 (2016).

20 29 Cole, M. W., Ito, T., Cocuzza, C. & Sanchez-Romero, R. The functional relevance  
21 of task-state functional connectivity. *Journal of Neuroscience* **41**, 2684-2702  
22 (2021).

23 30 Gonzalez-Castillo, J. & Bandettini, P. A. Task-based dynamic functional  
24 connectivity: Recent findings and open questions. *Neuroimage* **180**, 526-533  
25 (2018).

26 31 Gratton, C., Laumann, T. O., Gordon, E. M., Adeyemo, B. & Petersen, S. E.  
27 Evidence for two independent factors that modify brain networks to meet task  
28 goals. *Cell reports* **17**, 1276-1288 (2016).

29 32 Gratton, C. *et al.* Functional brain networks are dominated by stable group and  
30 individual factors, not cognitive or daily variation. *Neuron* **98**, 439-452. e435  
31 (2018).

- 1 33 Smith, S. M. *et al.* Correspondence of the brain's functional architecture during  
2 activation and rest. *Proceedings of the national academy of sciences* **106**, 13040-  
3 13045 (2009).
- 4 34 Raichle, M. E. *et al.* A default mode of brain function. *Proceedings of the National*  
5 *Academy of Sciences* **98**, 676-682 (2001).
- 6 35 Elton, A. & Gao, W. Task-positive functional connectivity of the default mode  
7 network transcends task domain. *Journal of Cognitive Neuroscience* **27**, 2369-  
8 2381 (2015).
- 9 36 Scheinost, D. *et al.* Sex differences in normal age trajectories of functional brain  
10 networks. *Human brain mapping* **36**, 1524-1535 (2015).
- 11 37 Ritchie, S. J. *et al.* Sex differences in the adult human brain: evidence from 5216  
12 UK biobank participants. *Cerebral cortex* **28**, 2959-2975 (2018).
- 13 38 Mazure, C. M. & Swendsen, J. Sex differences in Alzheimer's disease and other  
14 dementias. *The Lancet. Neurology* **15**, 451 (2016).
- 15 39 Labaka, A., Goñi-Balentiaga, O., Lebeña, A. & Pérez-Tejada, J. Biological sex  
16 differences in depression: a systematic review. *Biological research for nursing* **20**,  
17 383-392 (2018).
- 18 40 Rolls, E. T., Wan, Z., Cheng, W. & Feng, J. Risk-taking in humans and the medial  
19 orbitofrontal cortex reward system. *NeuroImage*, 118893 (2022).
- 20 41 Smith, S. M. *et al.* Brain aging comprises many modes of structural and  
21 functional change with distinct genetic and biophysical associations. *Elife* **9**,  
22 e52677 (2020).
- 23 42 Gudayol-Ferré, E., Però-Cebollero, M., González-Garrido, A. A. & Guàrdia-Olmos,  
24 J. Changes in brain connectivity related to the treatment of depression measured  
25 through fMRI: a systematic review. *Frontiers in human neuroscience* **9**, 582  
26 (2015).
- 27 43 Brakowski, J. *et al.* Resting state brain network function in major depression–  
28 depression symptomatology, antidepressant treatment effects, future research.  
29 *Journal of Psychiatric Research* **92**, 147-159 (2017).
- 30 44 Korgaonkar, M. S., Goldstein-Piekarski, A. N., Fornito, A. & Williams, L. M.  
31 Intrinsic connectomes are a predictive biomarker of remission in major  
32 depressive disorder. *Molecular psychiatry* **25**, 1537-1549 (2020).

1 45 Takeuchi, H. *et al.* The impact of television viewing on brain structures: cross-  
2 sectional and longitudinal analyses. *Cerebral Cortex* **25**, 1188-1197 (2015).

3 46 Kim, J. W. *et al.* Serum albumin and beta-amyloid deposition in the human brain.  
4 *Neurology* **95**, e815-e826 (2020).

5 47 Anjum, I., Jaffery, S. S., Fayyaz, M., Samoo, Z. & Anjum, S. The role of vitamin D in  
6 brain health: a mini literature review. *Cureus* **10** (2018).

7 48 Alonso, A. & de Larriva, A. P. A. Atrial fibrillation, cognitive decline and dementia.  
8 *European Cardiology Review* **11**, 49 (2016).

9 49 Carnevale, L. *et al.* Brain Functional Magnetic Resonance Imaging Highlights  
10 Altered Connections and Functional Networks in Patients With Hypertension.  
11 *Hypertension*, HYPERTENSIONAHA. 120.15296 (2020).

12 50 Popovych, O. V. *et al.* Inter-subject and inter-parcellation variability of resting-  
13 state whole-brain dynamical modeling. *NeuroImage*, 118201 (2021).

14 51 Beckmann, C. F. & Smith, S. M. Probabilistic independent component analysis for  
15 functional magnetic resonance imaging. *IEEE transactions on medical imaging*  
16 **23**, 137-152 (2004).

17 52 Hyvarinen, A. Fast and robust fixed-point algorithms for independent component  
18 analysis. *IEEE transactions on Neural Networks* **10**, 626-634 (1999).

19 53 Pervaiz, U., Vidaurre, D., Woolrich, M. W. & Smith, S. M. Optimising network  
20 modelling methods for fMRI. *Neuroimage* **211**, 116604 (2020).

21 54 He, T. *et al.* Deep neural networks and kernel regression achieve comparable  
22 accuracies for functional connectivity prediction of behavior and demographics.  
23 *NeuroImage* **206**, 116276 (2020).

24 55 Shen, L. & Thompson, P. M. Brain imaging genomics: integrated analysis and  
25 machine learning. *Proceedings of the IEEE* **108**, 125-162 (2019).

26 56 Keyes, K. M., Platt, J., Kaufman, A. S. & McLaughlin, K. A. Association of fluid  
27 intelligence and psychiatric disorders in a population-representative sample of  
28 US adolescents. *JAMA psychiatry* **74**, 179-188 (2017).

29 57 Zhao, B. *et al.* Genome-wide association analysis of 19,629 individuals identifies  
30 variants influencing regional brain volumes and refines their genetic co-  
31 architecture with cognitive and mental health traits. *Nature genetics* **51**, 1637-  
32 1644 (2019).

1 58 Noble, S., Scheinost, D. & Constable, R. T. A guide to the measurement and  
2 interpretation of fMRI test-retest reliability. *Current Opinion in Behavioral*  
3 *Sciences* **40**, 27-32 (2021).

4 59 Kennedy, J. T. *et al.* Reliability and Stability Challenges in ABCD Task fMRI Data.  
5 *bioRxiv* (2021).

6 60 Smith, S. M. & Nichols, T. E. Statistical challenges in “big data” human  
7 neuroimaging. *Neuron* **97**, 263-268 (2018).

8 61 Zhao, Y. & Castellanos, F. X. Annual research review: discovery science strategies  
9 in studies of the pathophysiology of child and adolescent psychiatric disorders-  
10 promises and limitations. *Journal of Child Psychology and Psychiatry* **57**, 421-439  
11 (2016).

12 62 Hariri, A. R., Tessitore, A., Mattay, V. S., Fera, F. & Weinberger, D. R. The  
13 amygdala response to emotional stimuli: a comparison of faces and scenes.  
14 *Neuroimage* **17**, 317-323 (2002).

15 63 Barch, D. M. *et al.* Function in the human connectome: task-fMRI and individual  
16 differences in behavior. *Neuroimage* **80**, 169-189 (2013).

17 64 Bijsterbosch, J. D. *et al.* The relationship between spatial configuration and  
18 functional connectivity of brain regions. *Elife* **7**, e32992 (2018).

19 65 Bijsterbosch, J. D., Beckmann, C. F., Woolrich, M. W., Smith, S. M. & Harrison, S.  
20 J. The relationship between spatial configuration and functional connectivity of  
21 brain regions revisited. *Elife* **8**, e44890 (2019).

22 66 Feis, R. A. *et al.* ICA-based artifact removal diminishes scan site differences in  
23 multi-center resting-state fMRI. *Frontiers in neuroscience* **9**, 395 (2015).

24 67 Griffanti, L. *et al.* ICA-based artefact removal and accelerated fMRI acquisition  
25 for improved resting state network imaging. *Neuroimage* **95**, 232-247 (2014).

26 68 Elliott, L. T. *et al.* Genome-wide association studies of brain imaging phenotypes  
27 in UK Biobank. *Nature* **562**, 210-216 (2018).

28 69 Dickie, E. W. *et al.* Ciftify: A framework for surface-based analysis of legacy MR  
29 acquisitions. *Neuroimage* **197**, 818-826 (2019).

30 70 Littlejohns, T. J. *et al.* The UK Biobank imaging enhancement of 100,000  
31 participants: rationale, data collection, management and future directions.  
32 *Nature communications* **11**, 1-12 (2020).



- 1 71 Dey, R. *et al.* An efficient and accurate frailty model approach for genome-wide  
2 survival association analysis controlling for population structure and relatedness  
3 in large-scale biobanks. *bioRxiv* (2020).
- 4 72 Jiang, L. *et al.* A resource-efficient tool for mixed model association analysis of  
5 large-scale data. *Nature genetics* **51**, 1749 (2019).
- 6 73 Mak, T. S. H., Porsch, R. M., Choi, S. W., Zhou, X. & Sham, P. C. Polygenic scores  
7 via penalized regression on summary statistics. *Genetic epidemiology* **41**, 469-  
8 480 (2017).
- 9 74 Friedman, J., Hastie, T. & Tibshirani, R. Regularization paths for generalized linear  
10 models via coordinate descent. *Journal of statistical software* **33**, 1 (2010).

11

## 12 **METHODS**

13 **Brain imaging data.** We generated functional connectivity measures from the raw resting  
14 and task fMRI data downloaded from the UKB data category 111 and 106, respectively.  
15 Details of image acquisition and preprocessing procedures were summarized in the  
16 **Supplementary Note**. We mapped the preprocessed images onto the Glasser360 atlas<sup>17</sup>,  
17 which projected the fMRI data onto a brain parcellation with 360 areas, resulting in a 360  
18 × 360 functional full correlation matrix for each subject (full correlation). The Glasser360  
19 atlas was originally a surface-based parcellation<sup>69</sup>, and has been converted into a  
20 volumetric atlas that is compatible with UKB data (**Supplementary Note**). The 360 brain  
21 functional areas were grouped into 12 functional networks<sup>19</sup>, including the primary visual,  
22 secondary visual, auditory, somatomotor, cingulo-opercular, default mode, dorsal  
23 attention, frontoparietal, language, posterior multimodal, ventral multimodal, and  
24 orbito-affective (**Table S1**). The 64,620 (360 × 359/2) functional connectivity measures  
25 were studied in our main analyses. These high-resolution fMRI traits provided fine details  
26 on cerebral cortex functional organization and allowed us to compare the resting and  
27 task-evoked functional architectures. To investigate the potential cross-parcellation  
28 variability, we also projected the fMRI data onto the Schaefer200 atlas<sup>20</sup> and obtained the  
29 200 × 200 functional connectivity matrices (full correlation, **Table S2**). The resting and task  
30 fMRI data from the HCP study were also used in our analysis (**Supplementary Note**). In  
31 addition to functional connectivity measures, we generated amplitude measures for the  
32 brain functional areas in the Glasser360 atlas, which quantified the brain functional

1 activity<sup>23,24</sup>. The UKB study has obtained ethics approval from the North West Multi-  
2 Centre Research Ethics Committee (MREC, approval number: 11/NW/0382), and  
3 obtained written informed consent from all participants prior to the study. All  
4 experimental procedures in the HCP study were approved by the institutional review  
5 boards at Washington University (approval number: 201204036).

6

### 7 **Age effects and sex differences analysis.**

8 Between 2006 and 2010, approximately half a million participants aged 40 to 69 were  
9 recruited for the UKB study. The UKB imaging study is an ongoing project to re-invite  
10 100,000 UKB participants to collect multi-modal brain and body imaging data<sup>70</sup>. We used  
11 the UKB phases 1 to 4 data (released up through early 2021,  $n = 40,880$  for resting fMRI  
12 and 34,671 for task fMRI) in our analysis. The age (at imaging) range of subjects was 44 to  
13 82 (mean age = 64.15, standard error = 7.74) and the proportion of female was 51.6%. In  
14 the age and sex analysis, we fitted the following model for each fMRI trait:  $y = x\beta_1 +$   
15  $z\beta_2 + xz\alpha + w\eta + \epsilon$ , where  $y$  is the standardized fMRI trait,  $x$  is the standardized  
16 age,  $z$  is the sex factor (0 for female and 1 for male),  $w$  is the set of adjusted covariates,  
17  $\beta_1$  is the main effect of  $x$  on  $y$ ,  $\beta_2$  is the main effect of  $z$  on  $y$ ,  $\alpha$  is the effect of  
18 age-sex interaction term  $xz$  on  $y$ ,  $\eta$  represents effects of covariates, and  $\epsilon$  is random  
19 error variable. We adjusted the following covariates: imaging site, head motion, head  
20 motion-squared, brain position, brain position-squared, volumetric scaling, height,  
21 weight, body mass index, heel bone mineral density, the top 10 genetic principal  
22 components. For each continuous trait or covariate variable, we removed values greater  
23 than five times the median absolute deviation from the median. These removed values  
24 will be treated as missing entries in the dataset. We performed the analysis in a discovery-  
25 validation design and only reported the results that were significant in both discovery and  
26 validation datasets (at different significance levels). Specifically, we used the UKB white  
27 British subjects in phases 1 to 3 data ( $n = 33,795$  for resting and 28,907 for task) as our  
28 discovery sample. The assignment of ancestry in UKB was based on self-reported ethnicity  
29 and has been verified in Bycroft, et al. <sup>16</sup>. The UKB non-British subjects in phases 1 to 3  
30 data and the individuals in newly released UKB phase 4 data ( $n = 5,961$  for resting and  
31 4,884 for task, removed relatives of the discovery sample) were treated as the validation  
32 sample. We reported  $P$  values from the two-sided t test and focused on the results that

1 were significant at Bonferroni significance level ( $7.73 \times 10^{-7}$ ,  $0.05/64,620$  for the  
2 Glasser360 atlas; and  $2.51 \times 10^{-6}$ ,  $0.05/19,900$  for the Schaefer200 atlas) in the discovery  
3 dataset and were also significant at nominal significance level (0.05) in the validation  
4 dataset.

5

#### 6 **Trait-fMRI association analysis.**

7 For each fMRI trait, we performed linear regression with 647 phenotypes, which were  
8 selected to reflect a variety of traits and diseases across different domains (**Table S3**).  
9 Specifically, there were 24 mental health traits (Category 100060), 10 cognitive traits  
10 (Category 100026), 12 physical activity traits (Category 100054), 6 electronic device use  
11 traits (Category 100053), 8 sun exposure traits (Category 100055), 3 sexual factor traits  
12 (Category 100056), 3 social support traits (Category 100061), 12 family history of diseases  
13 (Category 100034), 21 diet traits (Category 100052), 9 alcohol drinking traits (Category  
14 100051), 6 smoking traits (Category 100058), 34 blood biochemistry biomarkers  
15 (Category 17518), 3 blood pressure traits (Category 100011), 3 spirometry traits (Category  
16 100020), 20 early life factors (Categories 135, 100033, 100034, and 100072), 9 greenspace  
17 and coastal proximity (Category 151), 2 hand grip strength (Category 100019), 13  
18 residential air pollution traits (Category 114), 5 residential noise pollution traits (Category  
19 115), 2 body composition traits by impedance (Category 100009), 4 health and medical  
20 history traits (Category 100036), 3 female specific factors (Category 100069), 1 education  
21 trait (Category 100063), 48 curated disease phenotypes based on Dey, et al. <sup>71</sup>, and 386  
22 disease diagnosis coded according to International Classification of Diseases (ICD-10,  
23 Category 2002). We selected all diseases in Category 2002 that had at least 100 patients  
24 in our resting fMRI imaging cohort.

25

26 For all traits, we adjusted for the effects of age (at imaging), age-squared, sex, age-sex  
27 interaction, age-squared-sex interaction, imaging site, head motion, head motion-  
28 squared, brain position, brain position-squared, volumetric scaling, height, weight, body  
29 mass index, heel bone mineral density, and the top 10 genetic principal components.  
30 Similar to the age and sex analysis, we used the UKB white British subjects in phases 1 to  
31 3 data ( $n = 33,795$  for resting and  $28,907$  for task) as our discovery sample and validated  
32 our results in the hold-out independent validation dataset ( $n = 5,961$  for resting and  $4,884$

1 for task, removed relatives of the discovery sample). We reported  $P$  values from the two-  
2 sided t test and prioritized on the results that were significant at FDR 5% level in the  
3 discovery dataset and were also significant at nominal significance level (0.05) in the  
4 validation dataset.

#### 6 **Prediction models with multiple data types.**

7 We built prediction models for fluid intelligence using multi-modality neuroimaging traits,  
8 including 64,620 resting fMRI traits, 64,620 task fMRI traits, 215 DTI parameters from  
9 dMRI<sup>21</sup>, and 101 regional brain volumes from sMRI<sup>57</sup>. After removing relatives according  
10 to Bycroft, et al. <sup>16</sup>, we randomly partitioned the white British imaging subjects into three  
11 independent datasets: training ( $n = 20,270$ ), validation ( $n = 6,764$ ), and testing ( $n = 6,761$ ).  
12 The effect sizes of imaging predictors were estimated from the training data ( $n = 20,270$ ).  
13 We removed the effects of age, age-squared, sex, age-sex interaction, age-squared-sex  
14 interaction, imaging site, head motion, head motion-squared, brain position, brain  
15 position-squared, volumetric scaling, height, weight, body mass index, heel bone mineral  
16 density, and the top 10 genetic principal components.

17  
18 We also integrated other data types into our prediction model, including genetic variants  
19 and several categories of traits studied in our trait-fMRI association analysis (**Table S4**).  
20 For non-neuroimaging traits, the effect sizes were estimated from all UKB white British  
21 subjects except for the ones in validation and testing data (after removing relatives). We  
22 adjusted for all the covariates listed above for neuroimaging traits, except for the imaging-  
23 specific variables including imaging site, head motion, volumetric scaling, and brain  
24 position. The genetic effects were estimated by fastGWA<sup>72</sup> and were aggregated using  
25 polygenic risk scores via lassosum<sup>73</sup>. We downloaded imputed genotyping data (Category  
26 100319) and performed the following quality controls<sup>57</sup>: 1) excluded subjects with more  
27 than 10% missing genotypes; 2) excluded variants with minor allele frequency less than  
28 0.01; 3) excluded variants with missing genotype rate larger than 10%; 4) excluded  
29 variants that failed the Hardy-Weinberg test at  $1 \times 10^{-7}$  level; and 5) removed variants  
30 with imputation INFO score less than 0.8. All non-genetic predictors (including  
31 neuroimaging traits) were modeled using ridge regression via glmnet<sup>74</sup> (R version 3.6.0).  
32 All model parameters were tuned in the validation dataset, and we evaluated the

1 prediction performance on the testing data by calculating the correlation between the  
2 predicted values and the observed ones.

3

#### 4 **Code availability**

5 We made use of publicly available software and tools. The codes used to generate fMRI  
6 traits are publicly available on Zenodo (<https://doi.org/10.5281/zenodo.5784010>).

7

#### 8 **Data availability**

9 Our results and summary-level data can be downloaded and browsed at  
10 <http://165.227.92.206/>. The individual-level UK Biobank data can be obtained from  
11 <https://www.ukbiobank.ac.uk/>.

12

#### 13 **Figure legends**

##### 14 **Fig. 1 Illustration of functional areas and networks in the Glasser360 atlas.**

15 **(A)** Functional areas defined in the Glasser360 atlas (left hemisphere). See Table S1 for  
16 information of these areas and Figure S1 for maps of the whole brain (both hemispheres).  
17 Visual1, the primary visual network; Visual2, the secondary visual network. **(B)**  
18 Annotation of the 12 functional networks in the human brain. The default mode network  
19 (bottom right) is further divided into seven clusters, mainly based on their physical  
20 locations. See Figure S11 for more information of the seven clusters.

21

##### 22 **Fig. 2 Distribution of reproducibility across brain functional areas and networks.**

23 We illustrate the spatial maps of reproducibility of functional connectivity for resting fMRI  
24 in **(A)** and task fMRI in **(B)**. **(C)** Comparison of reproducibility of functional connectivity  
25 across 12 brain functional networks in resting (left panel) and task (right panel) fMRI. **(D)**  
26 Comparison of reproducibility of functional connectivity between the activated areas  
27 (within activation) and the nonactivated areas (out of activation) in task fMRI. **(E)**  
28 Comparison of reproducibility of amplitude measures in resting (left panel) and task (right  
29 panel) fMRI. See Table S1 for information of the labeled brain areas. **(F)** Comparison of  
30 reproducibility of amplitude measures between the activated areas (within activation)

1 and the nonactivated areas (out of activation) in task fMRI. The activation map can be  
2 found in Figure S8.

3

4 **Fig. 3 Spatial pattern of age and sex effects on brain functional organizations.**

5 We illustrate the spatial pattern of age effects (after adjusting for covariates) on  
6 functional connectivity for resting fMRI in **(A)** and for task fMRI in **(B)**. **(C)** and **(D)** display  
7 the spatial pattern of age effects on amplitude measures of resting and task fMRI,  
8 respectively. See Table S1 for information of the labeled brain areas. We illustrate the  
9 spatial pattern of sex effects (after adjusting for covariates) on functional connectivity for  
10 resting fMRI in **(E)** and for task fMRI in **(F)**. **(G)** and **(H)** display the spatial pattern of sex  
11 effects on amplitude measures of resting and task fMRI, respectively. We labeled the  
12 brain areas with the strongest age and sex effects in amplitude measures. For functional  
13 connectivity, we illustrated the effects passing the Bonferroni significance level ( $7.73 \times$   
14  $10^{-7}$ ,  $0.05/64,620$ ) in the discovery dataset ( $n = 33,795$  for resting and  $28,907$  for task)  
15 and being significant at the nominal significance level (0.05) in the validation dataset ( $n =$   
16  $5,961$  for resting and  $4,884$  for task).

17

18 **Fig. 4 Selected complex traits that were associated with brain functional organizations.**

19 **(A)** Associations between risk-taking (Data field 2040) and functional connectivity of  
20 resting fMRI. This figure and the top-ranked brain areas can be viewed in an interactive  
21 version at <http://165.227.92.206/trait/trait85.html>. **(B)** Associations between depression  
22 (curated disease phenotype) and functional connectivity of resting fMRI. This figure and  
23 the top-ranked brain areas can be viewed in an interactive version at  
24 <http://165.227.92.206/trait/trait230.html>. We illustrated the estimated correlation  
25 coefficients that were significant at FDR 5% level in the discovery sample ( $n = 33,795$ ) and  
26 were also significant at the nominal significance level (0.05) in the validation dataset ( $n =$   
27  $5,961$ ). **(C)** and **(D)** display the spatial pattern of associations with amplitude measures of  
28 resting fMRI for risk-taking and depression, respectively. Brain areas with the strongest  
29 associations were labeled. See Table S1 for information of these areas.

30

1 **Fig. 5 Selected complex traits that were associated with brain functional organizations.**

2 **(A)** Associations between fluid intelligence (Data field 20016) and functional connectivity  
3 of resting fMRI. This figure and the top-ranked brain areas can be viewed in an interactive  
4 version at <http://165.227.92.206/trait/trait158.html>. **(B)** Associations between time  
5 spent watching TV (Data field 1070) and functional connectivity of resting fMRI. This  
6 figure and the top-ranked brain areas can be viewed in an interactive version at  
7 <http://165.227.92.206/trait/trait101.html>. We illustrated the estimated correlation  
8 coefficients that were significant at FDR 5% level in the discovery sample ( $n = 33,795$ ) and  
9 were also significant at the nominal significance level (0.05) in the validation dataset ( $n =$   
10  $5,961$ ). **(C)** and **(D)** display the spatial pattern of associations with amplitude measures of  
11 resting fMRI for fluid intelligence and time spent watching TV, respectively. Brain areas  
12 with the strongest associations were labeled. See Table S1 for information of these areas.  
13

14 **Fig. 6 Integrative prediction model for fluid intelligence.**

15 **(A)** Prediction accuracy of neuroimaging traits for fluid intelligence. Volume, region brain  
16 volumes from brain structural MRI (sMRI); DTI parameters, diffusion tensor imaging  
17 parameters to measure brain white matter microstructures; All MRI traits, including brain  
18 volume, DTI parameters, resting fMRI, and task fMRI. **(B)** Prediction accuracy of non-  
19 neuroimaging traits from different trait categories and their joint performance. PRS,  
20 polygenic risk scores of genetic variants. **(C)** Comparison of predictive power of non-  
21 neuroimaging traits before (“marginal”) and after controlling for the neuroimaging traits  
22 (“conditional on brain imaging”).

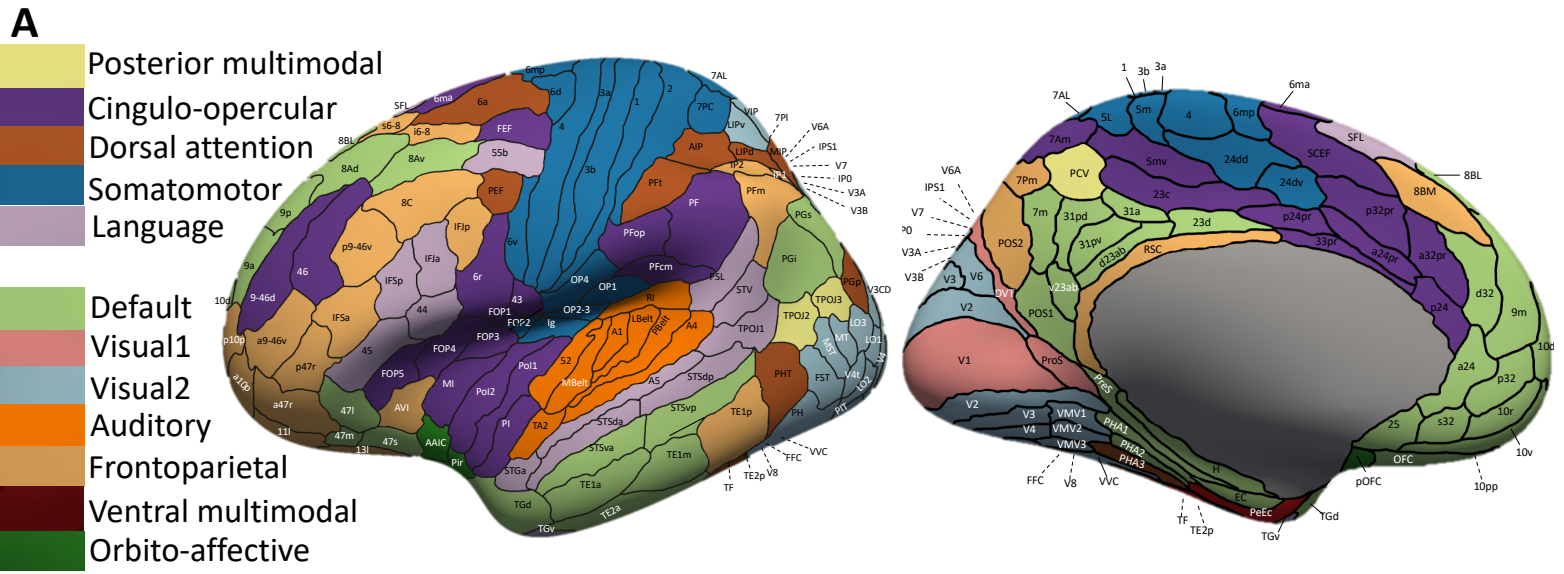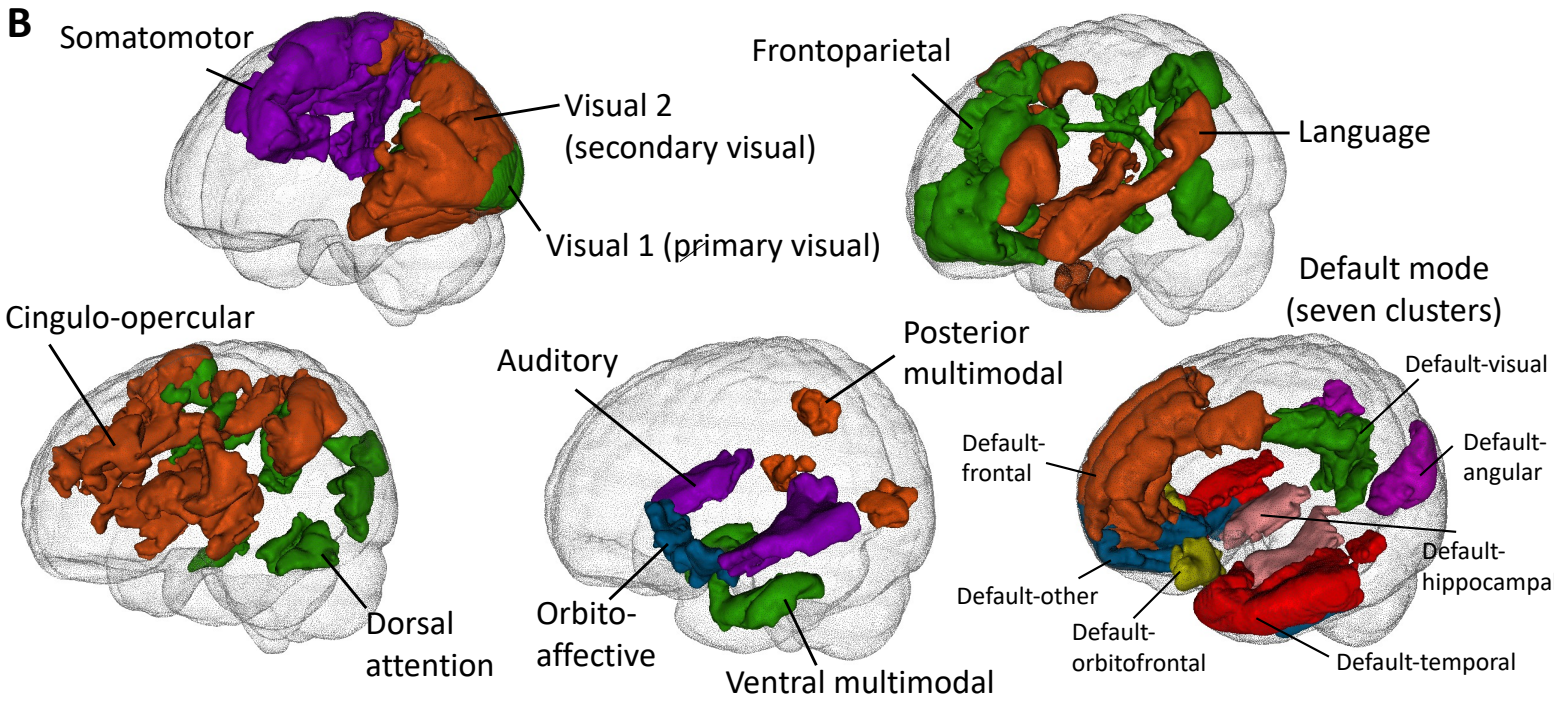

Figure 1



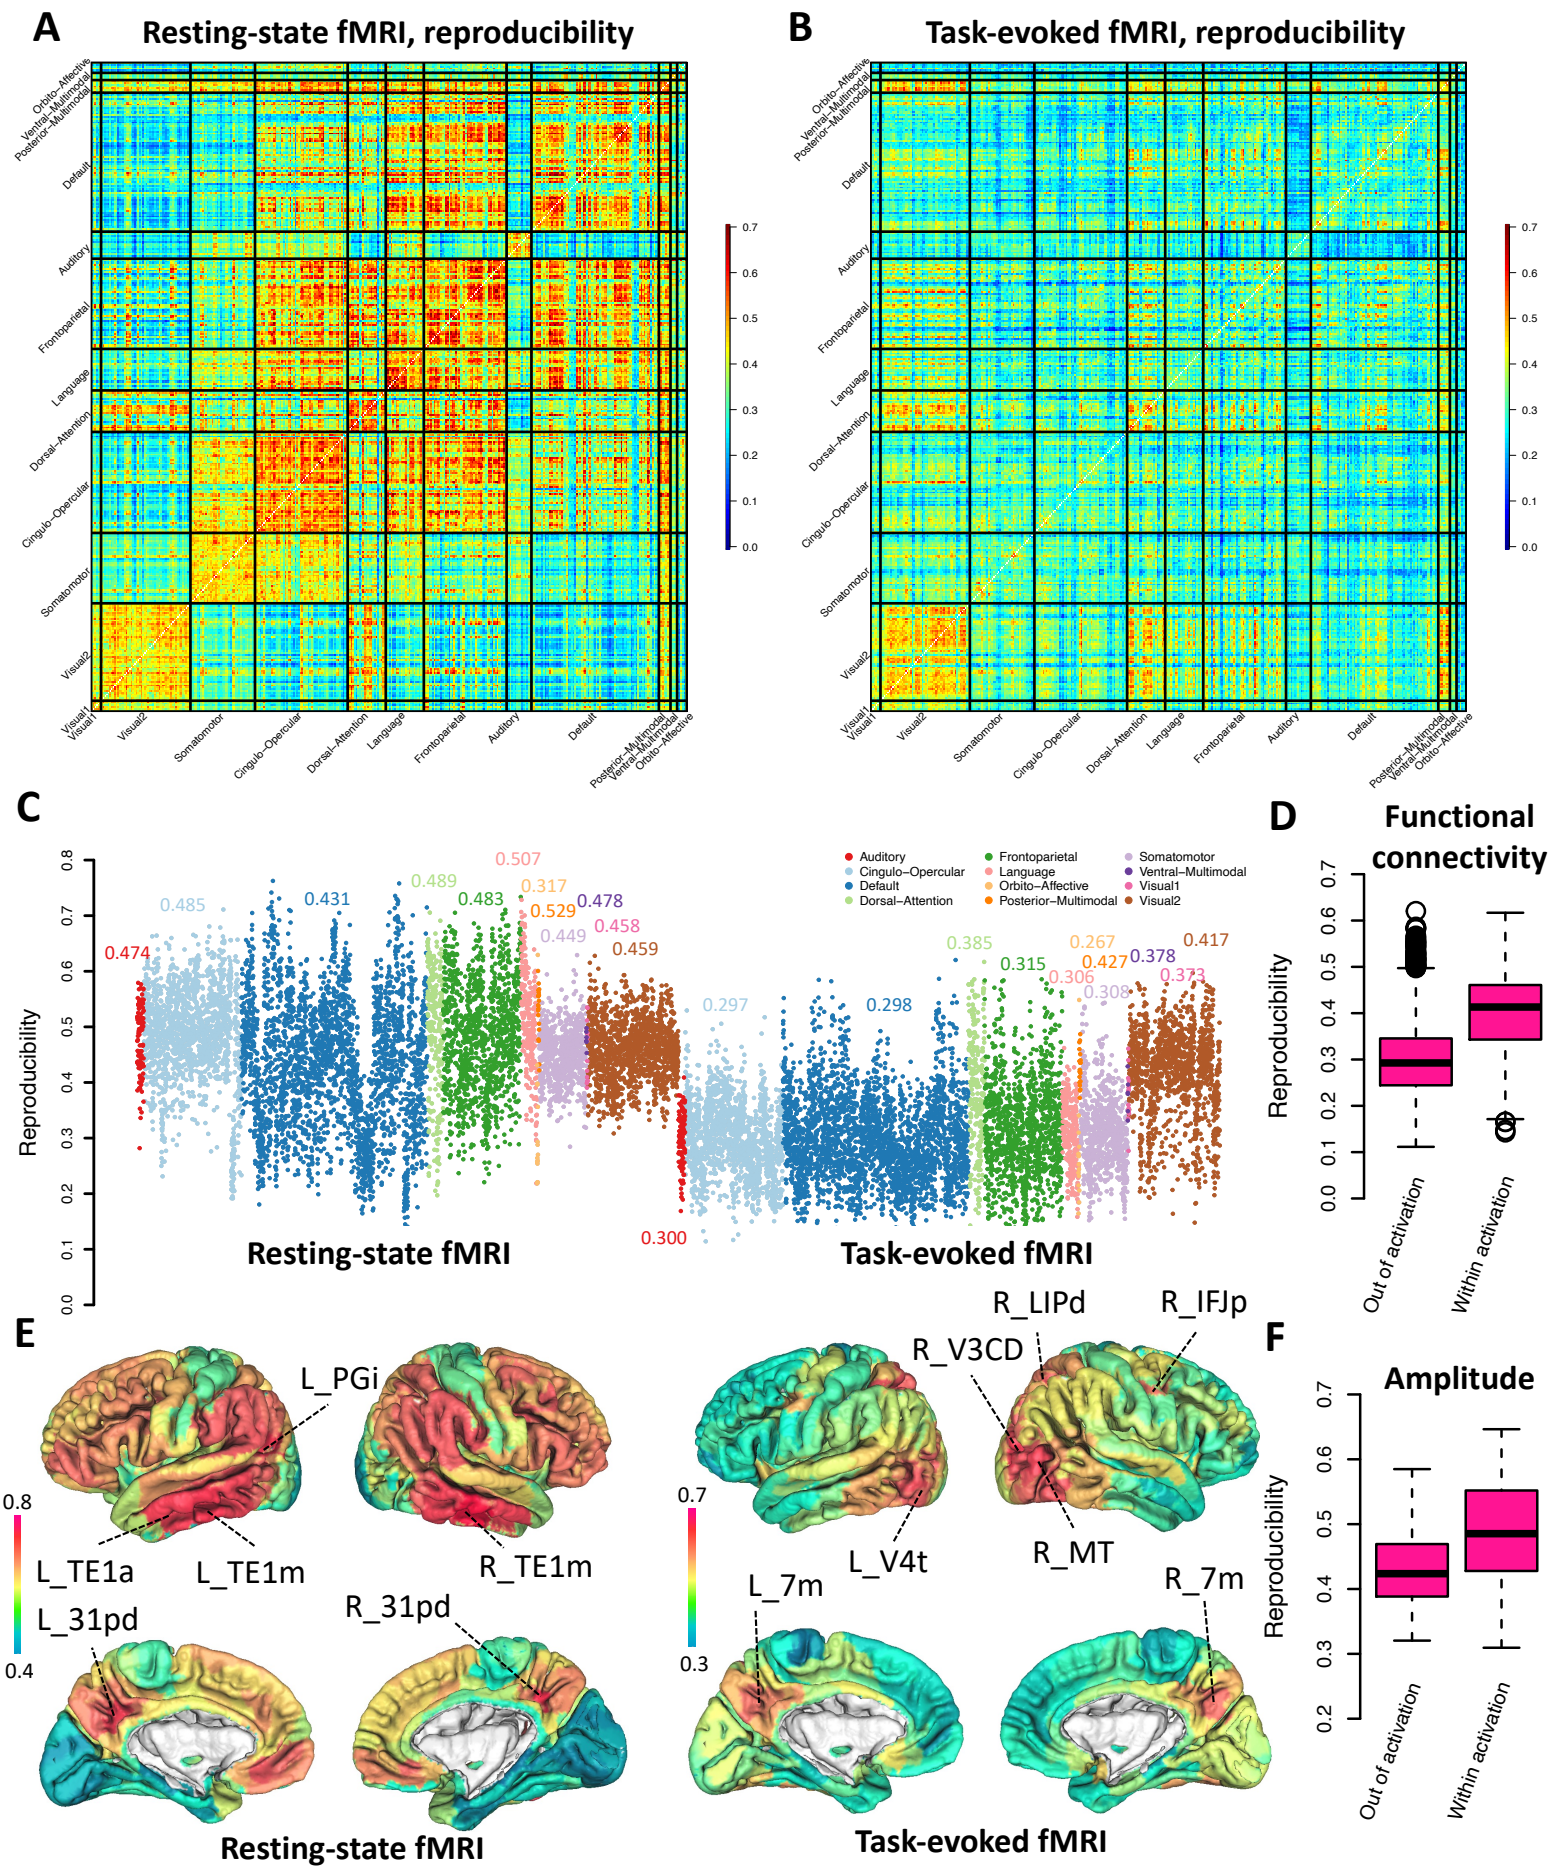

Figure 2

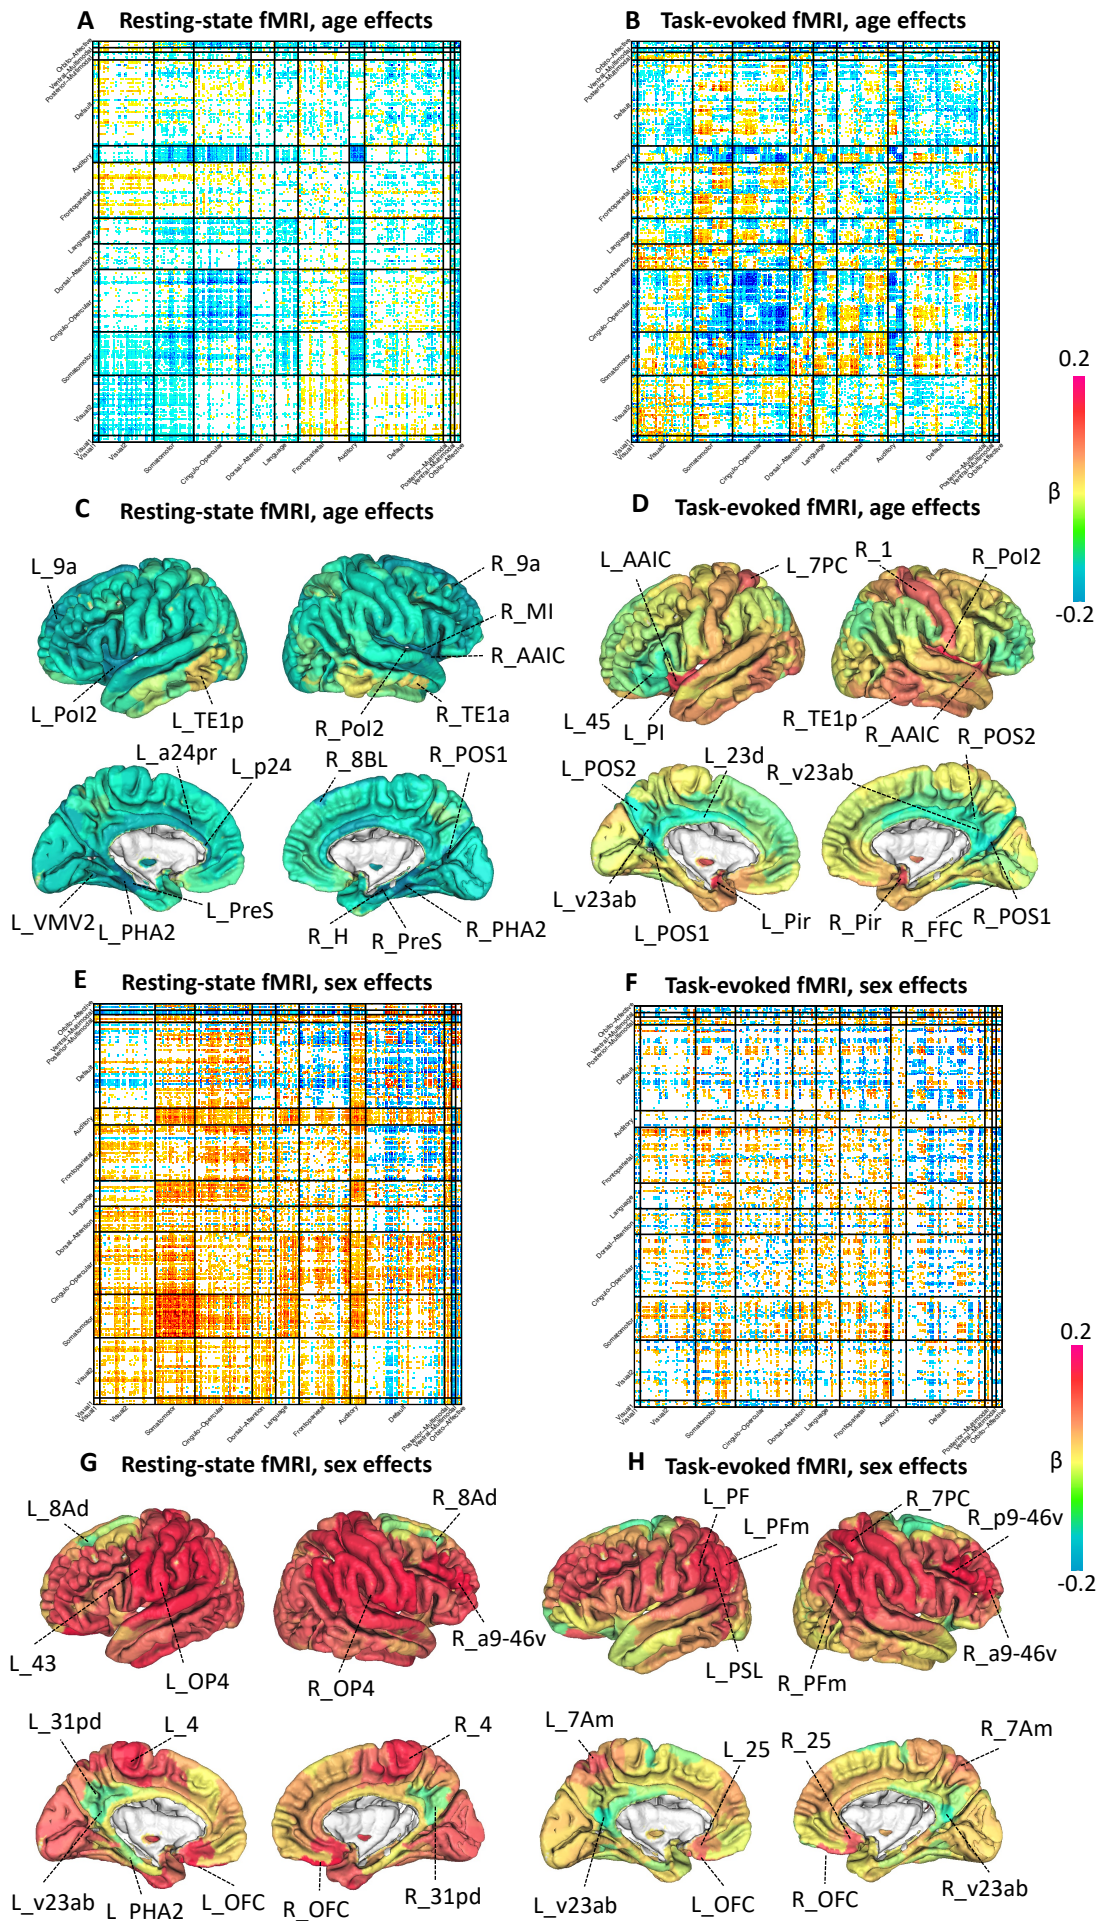



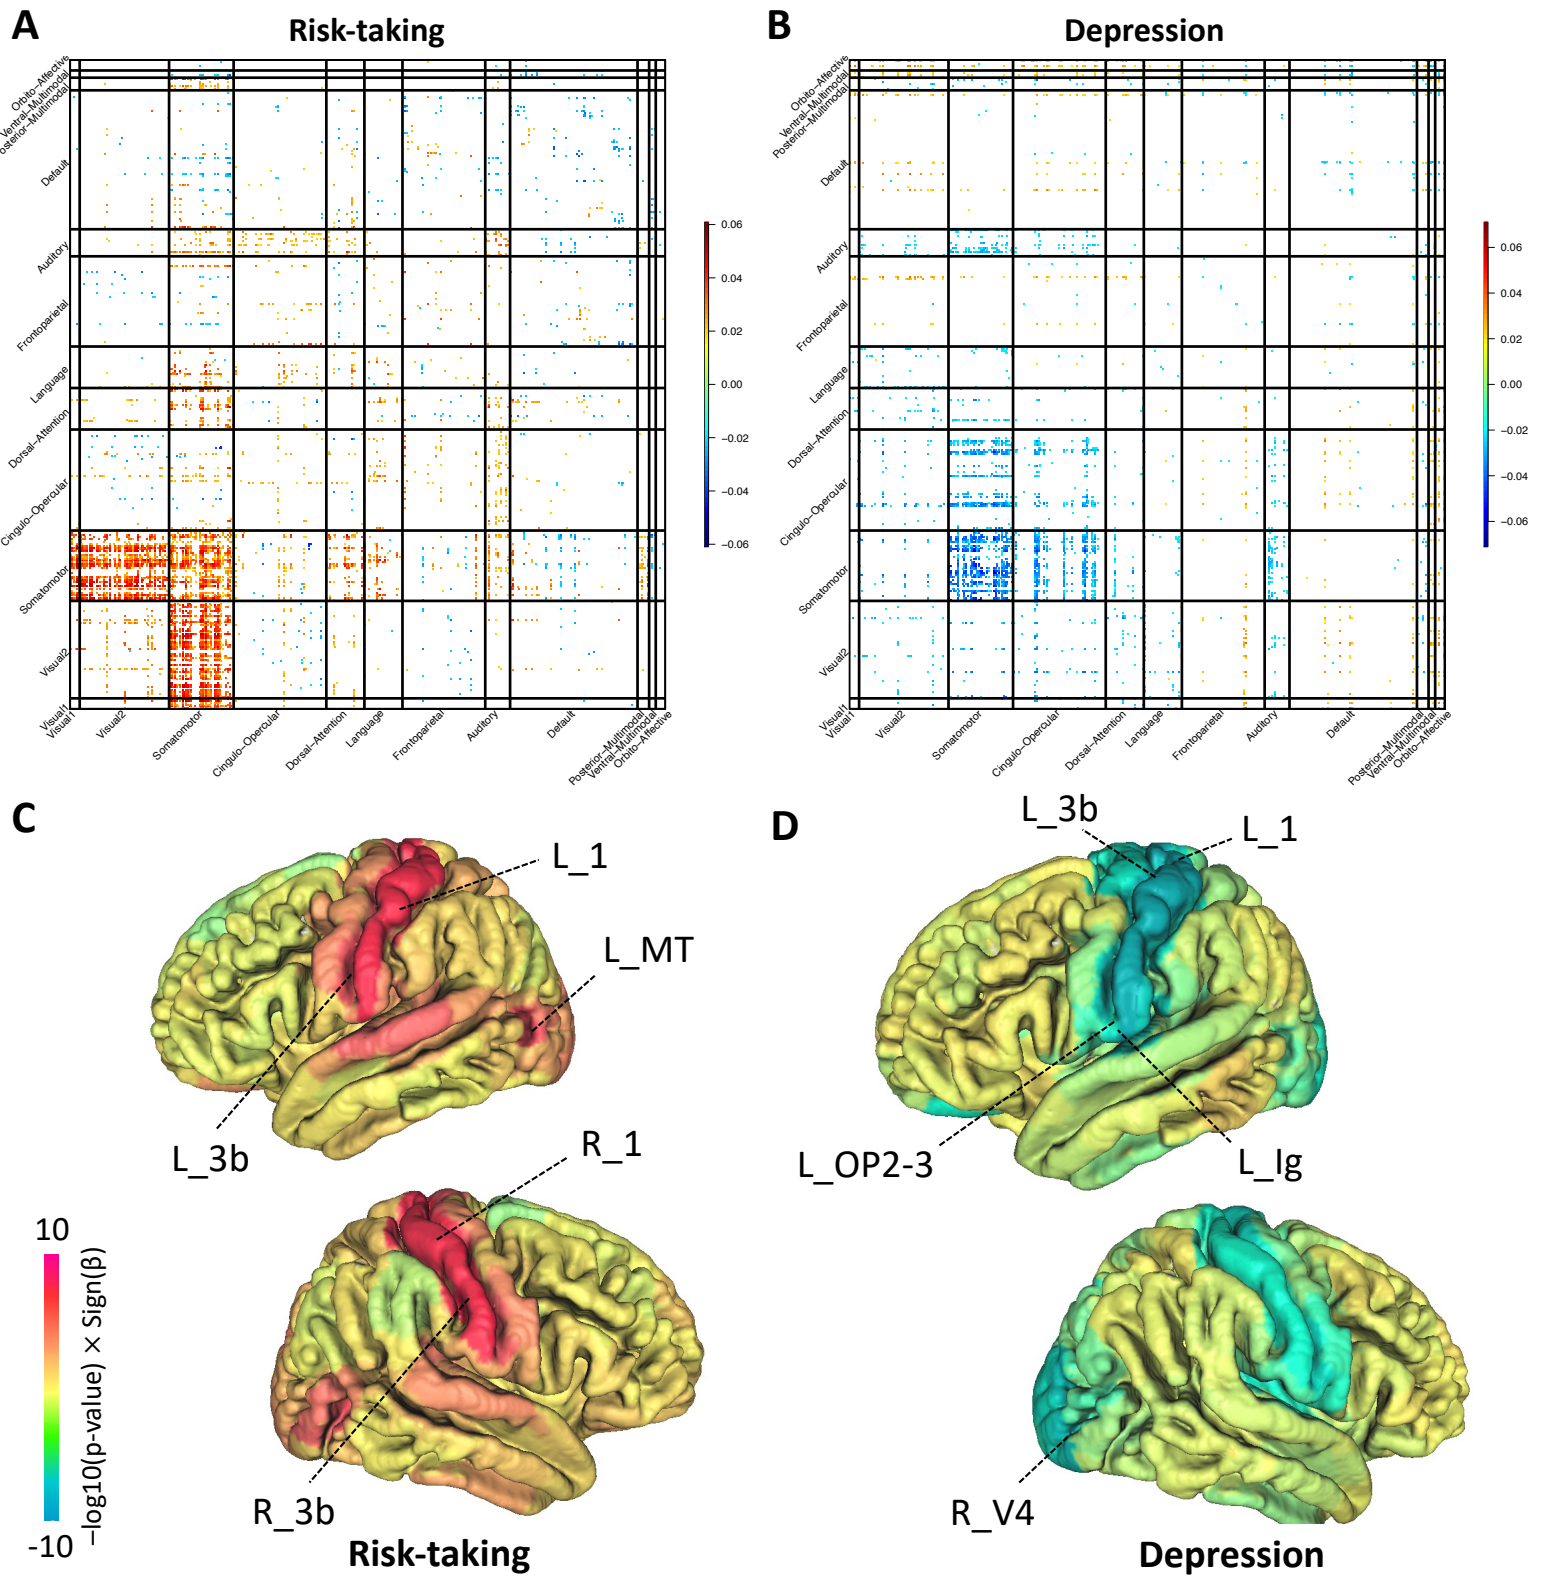

Figure 4

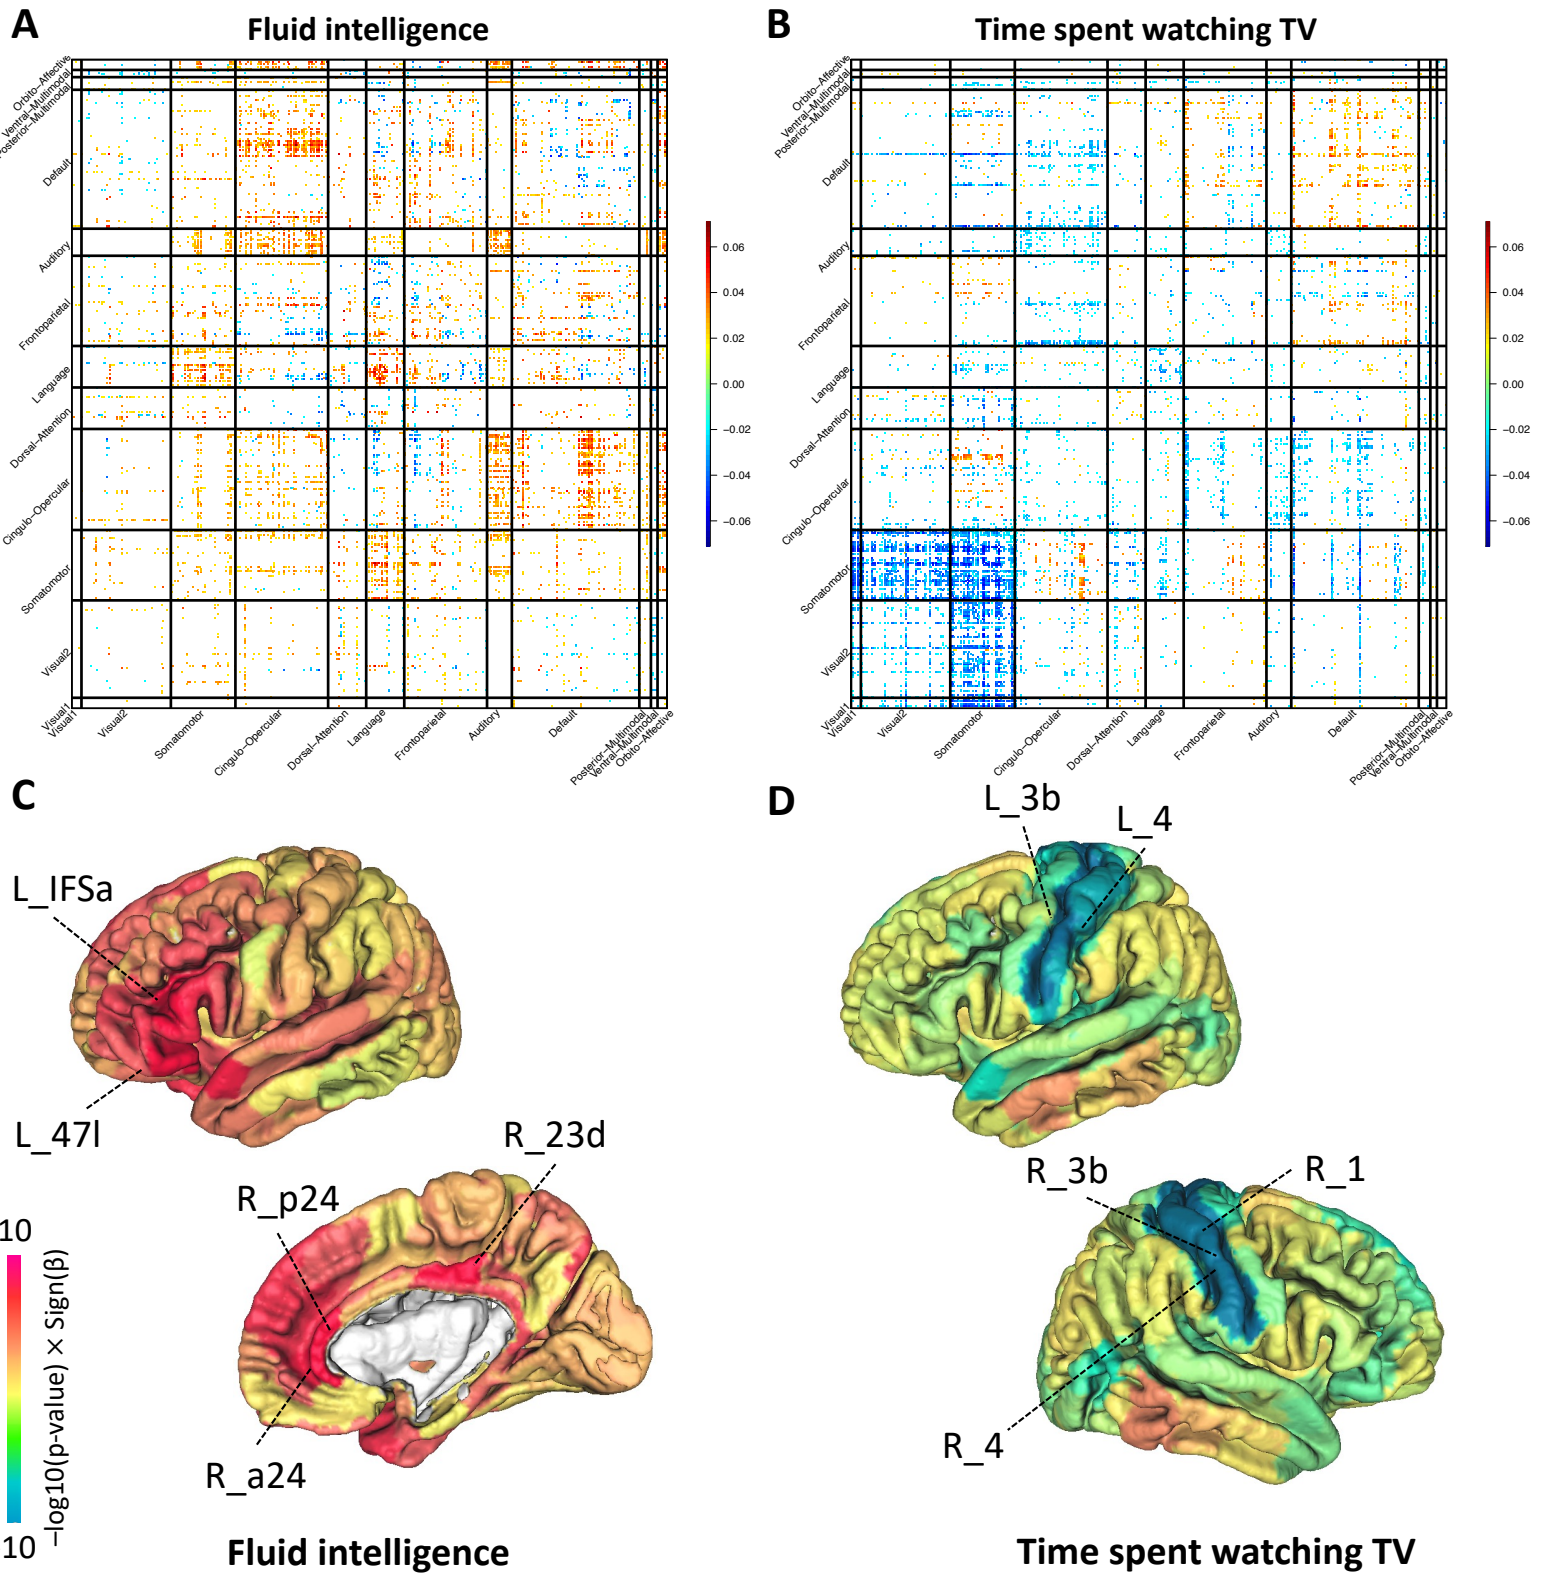

Figure 5

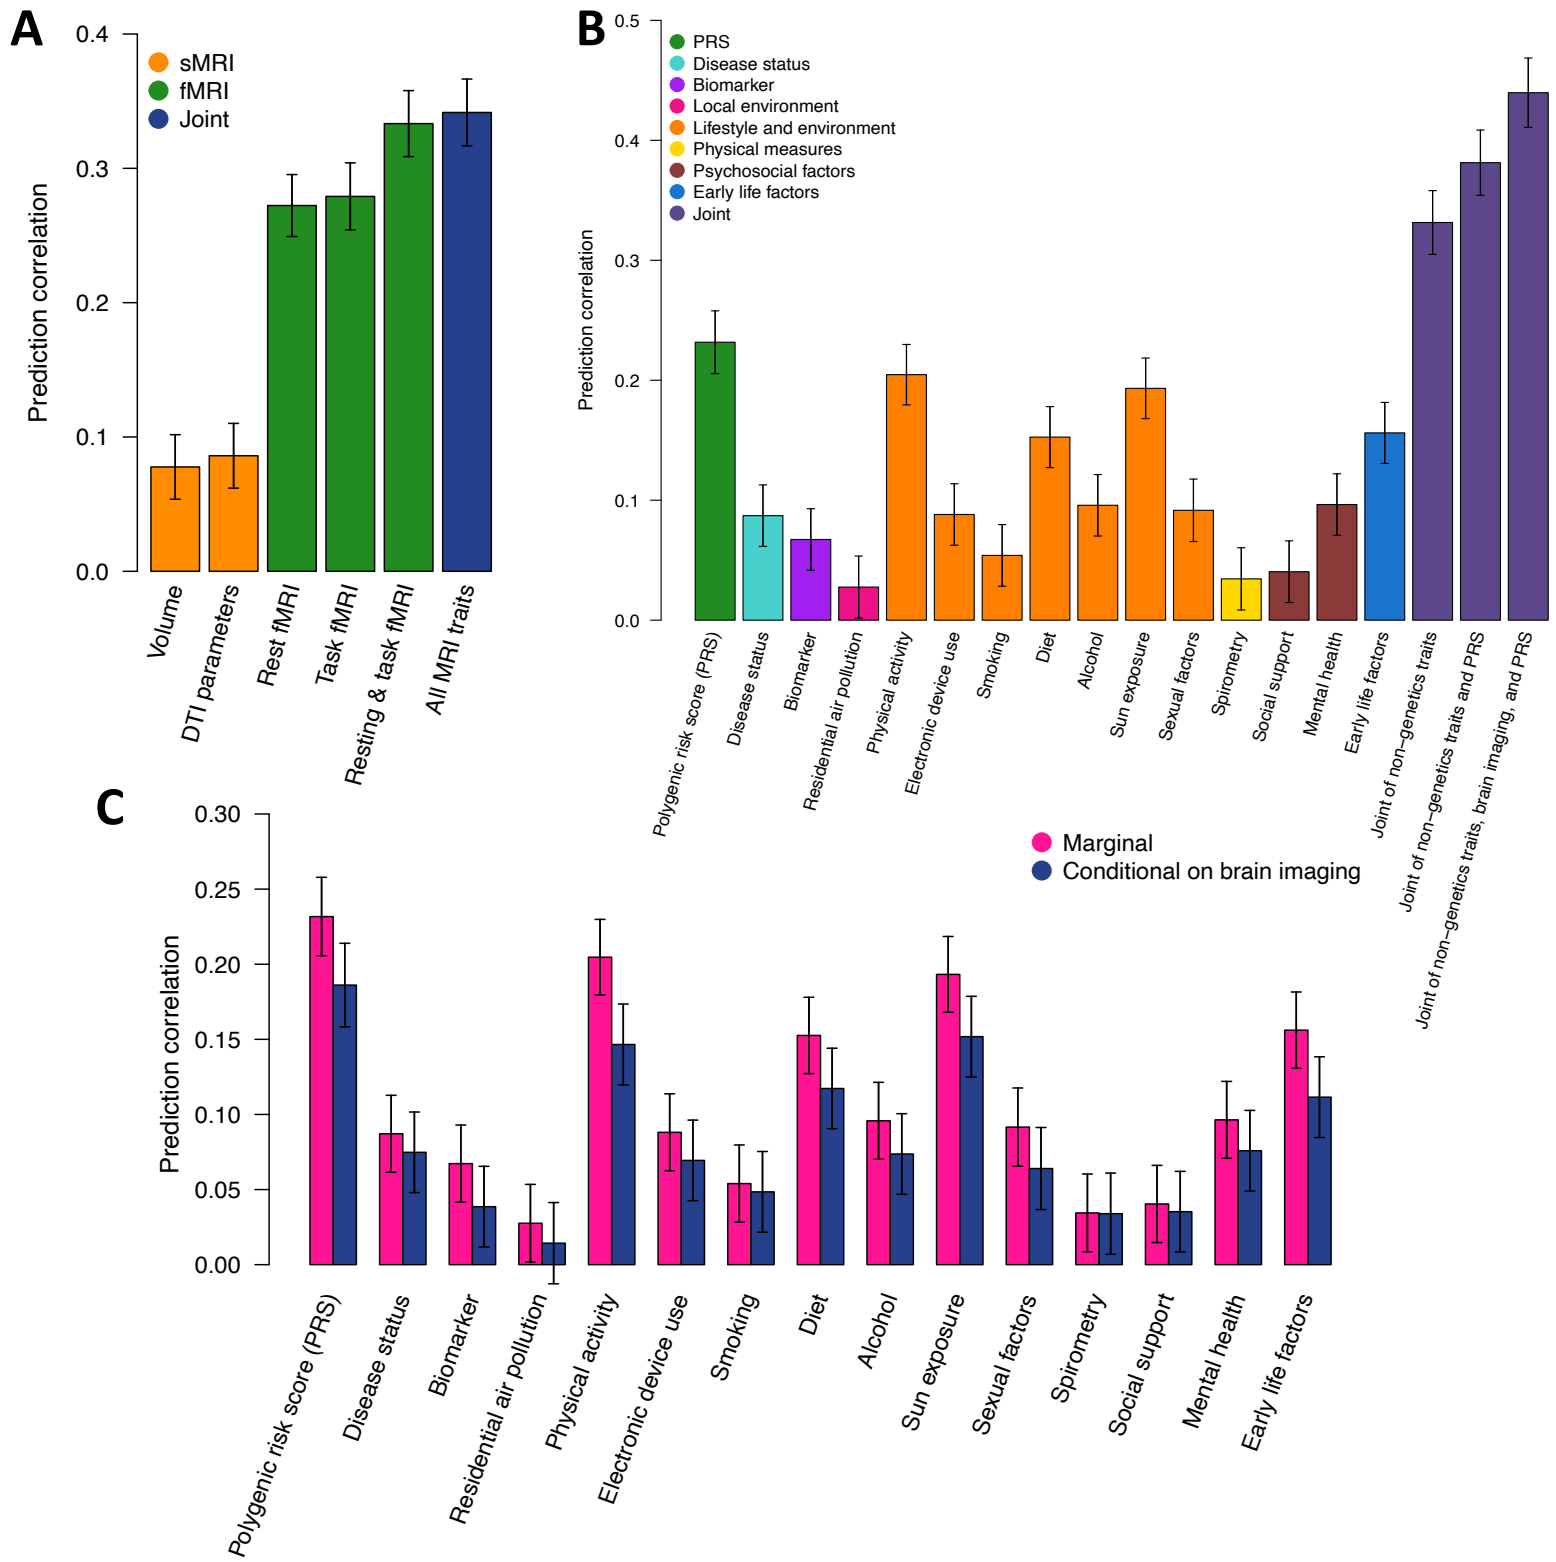

Figure 6
